# Supplementary material for: Applications of 3-aminolactams: design, synthesis, and biological evaluation of a library of potential dimerisation inhibitors of HIV1-protease
Source: Royal Society of Chemistry journal article supplement (doi:10.1039/c2ob25291k), 2012-01-01
Supplement: c2ob25291k.pdf [file c2ob25291k.pdf]

# Applications of 3-aminolactams: design, synthesis, and biological evaluation of a library of HIV1-protease inhibitors

*Eulàlia Pinyol,<sup>a</sup> Silvia Frutos,<sup>a</sup> Dolors Grillo-Bosch,<sup>a</sup> Ernest Giralt,<sup>a,b</sup> Bonaventura Clotet,<sup>c</sup> Jose  
A. Esté,<sup>c</sup> Anna Diez<sup>a,d\*</sup>*

## Supplementary material

### Index

- <sup>1</sup>H- and <sup>13</sup>C-NMR spectra of compounds **Ile-PheNH<sub>2</sub>** and **Asn-PheO<sup>t</sup>Bu**
- <sup>1</sup>H- and <sup>13</sup>C-NMR spectra, and HRMS of compounds **3a** and **3b**
- Analytical HPLC and MS of compounds **4-18cc**
- Cell culture activity against native HIV1 and resistant mutant IRL98DPRO

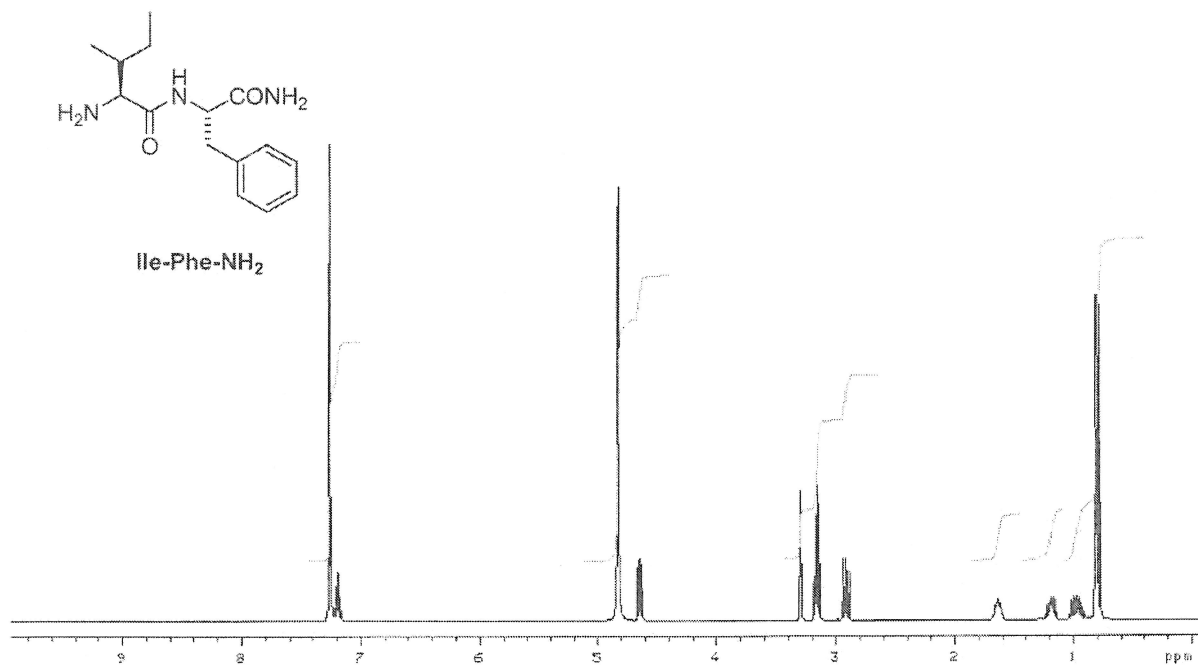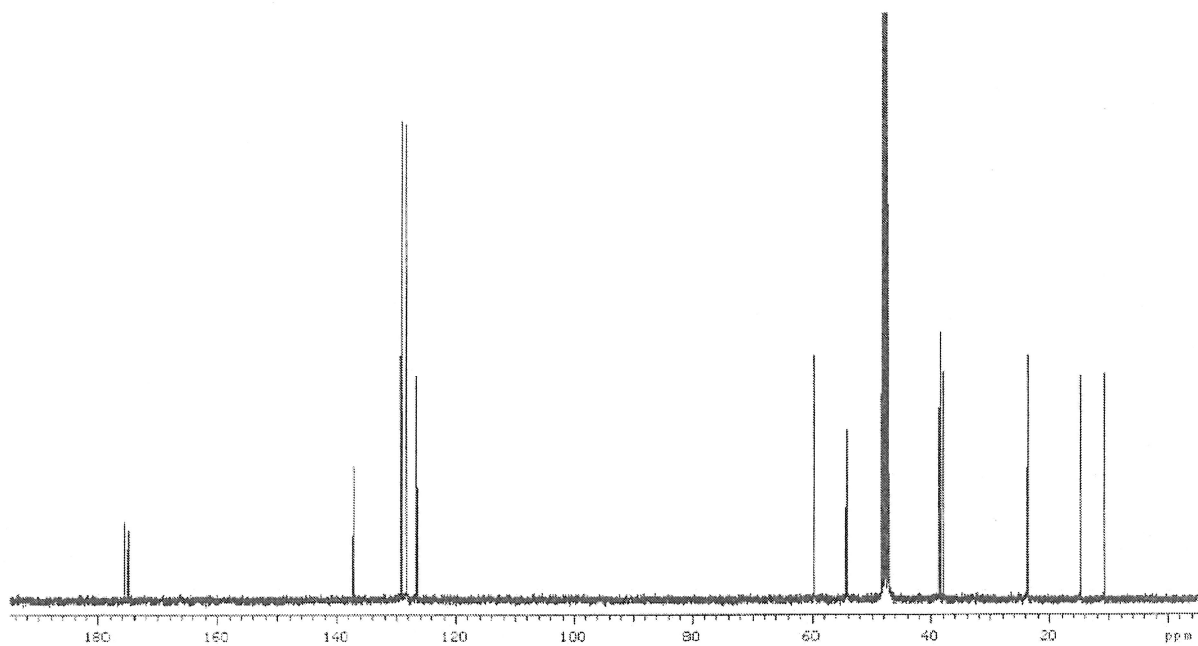

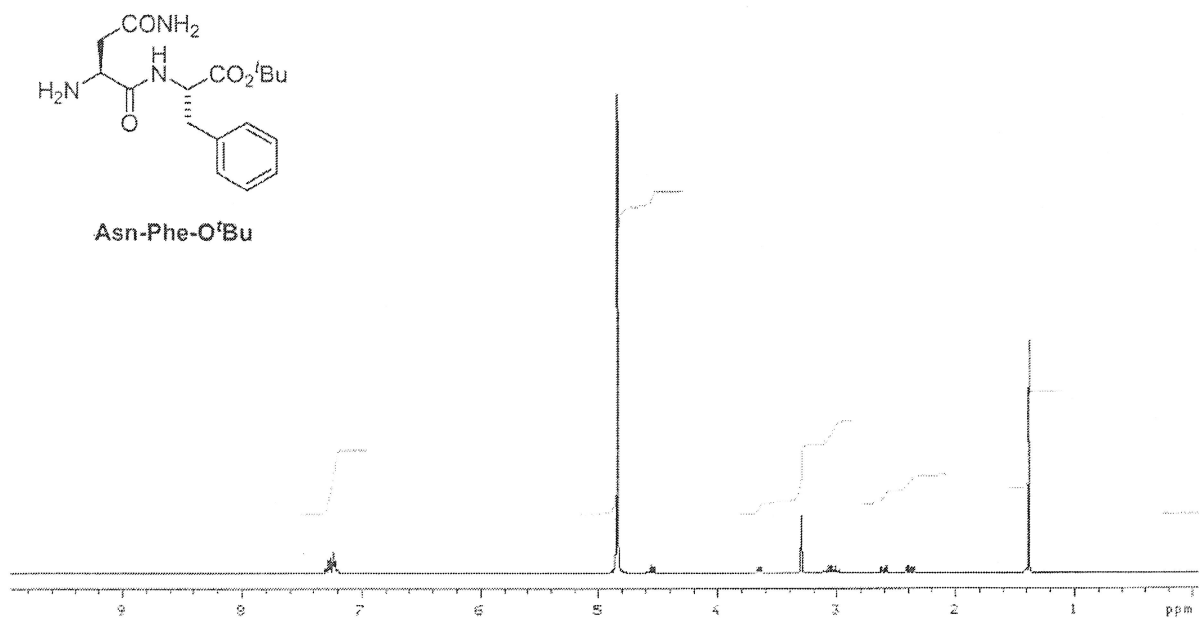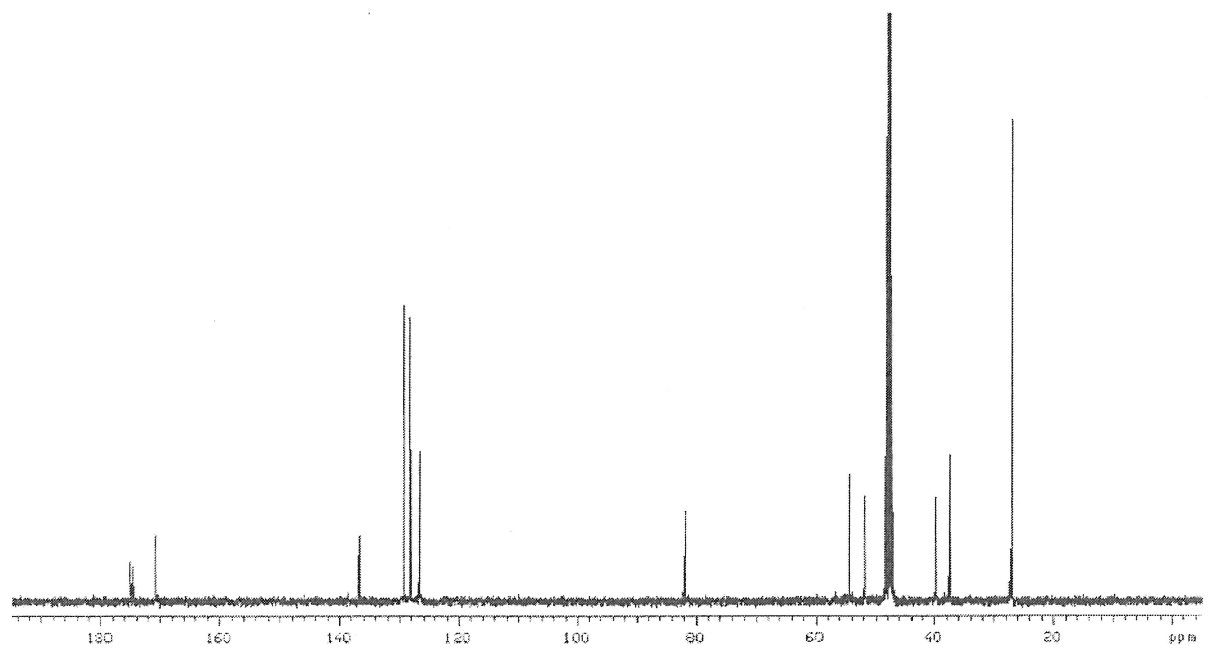

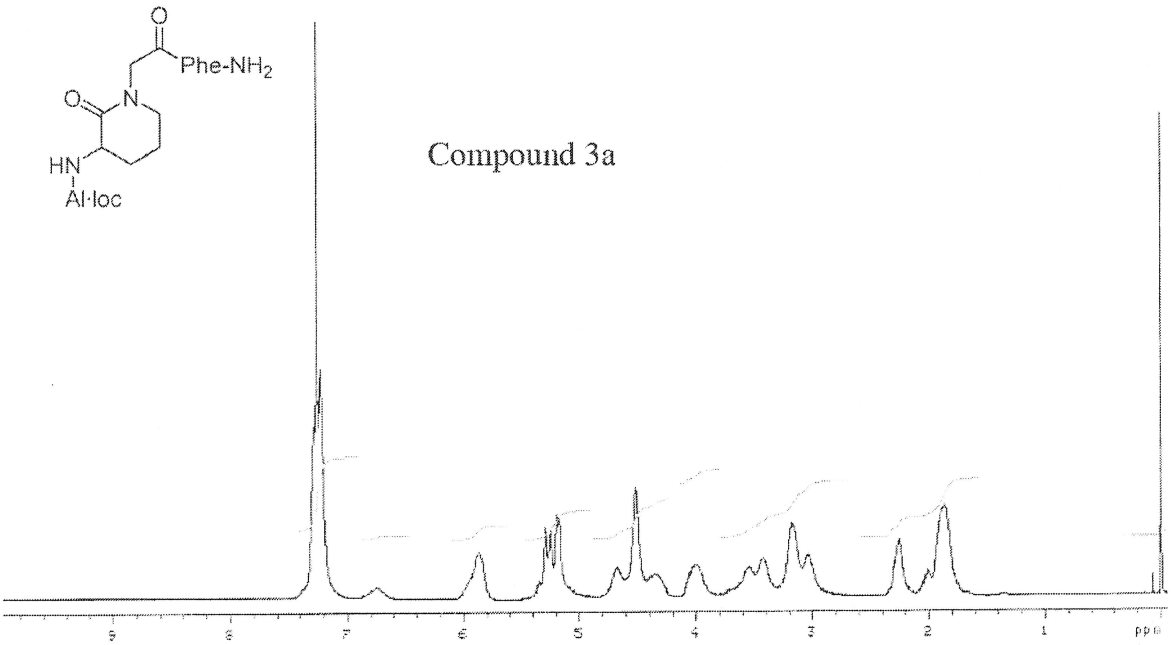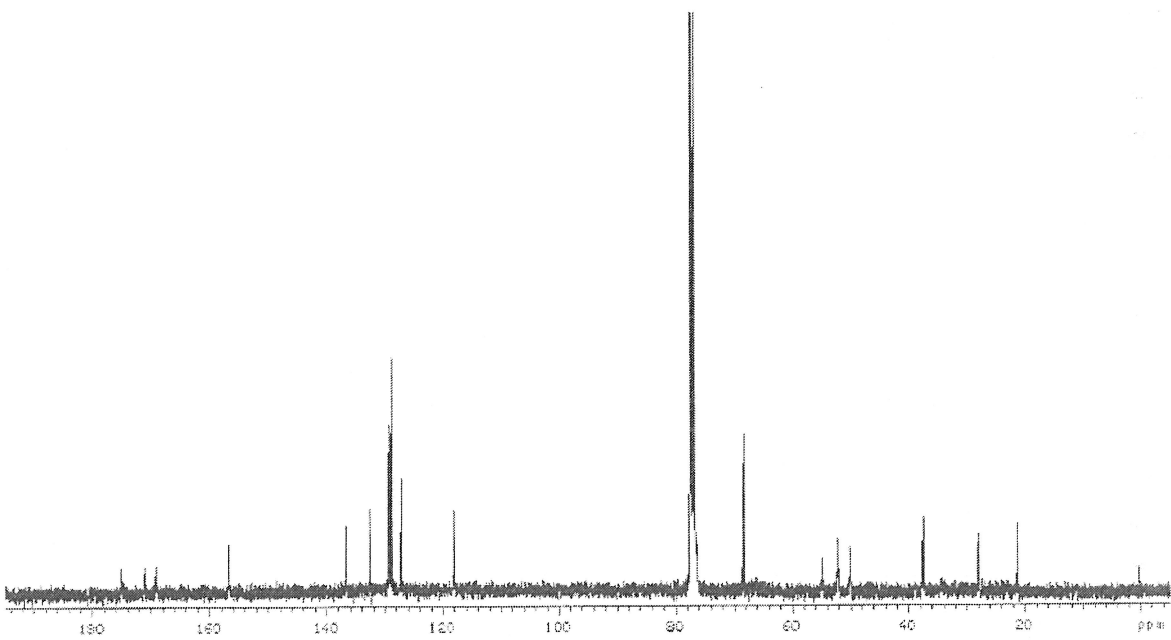



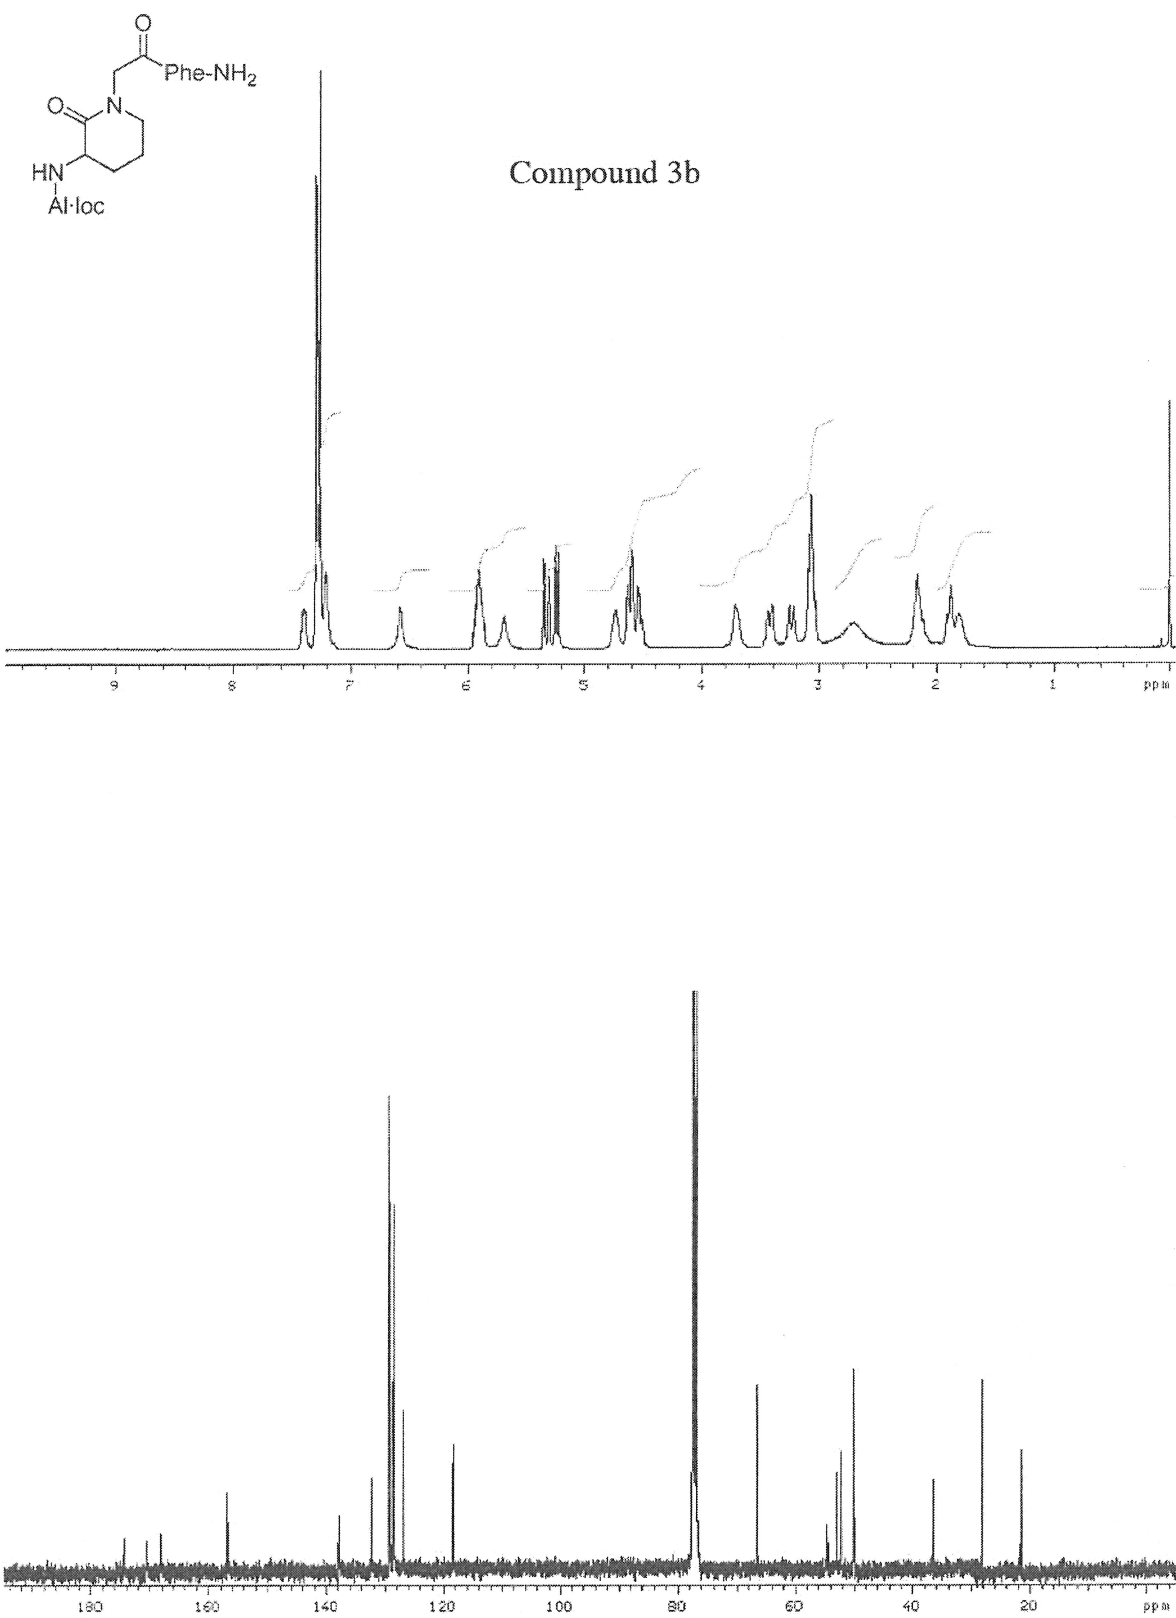

C:\Xcalibur\...1100525\_EP-223\_a

5/25/2010 7:07:29 PM

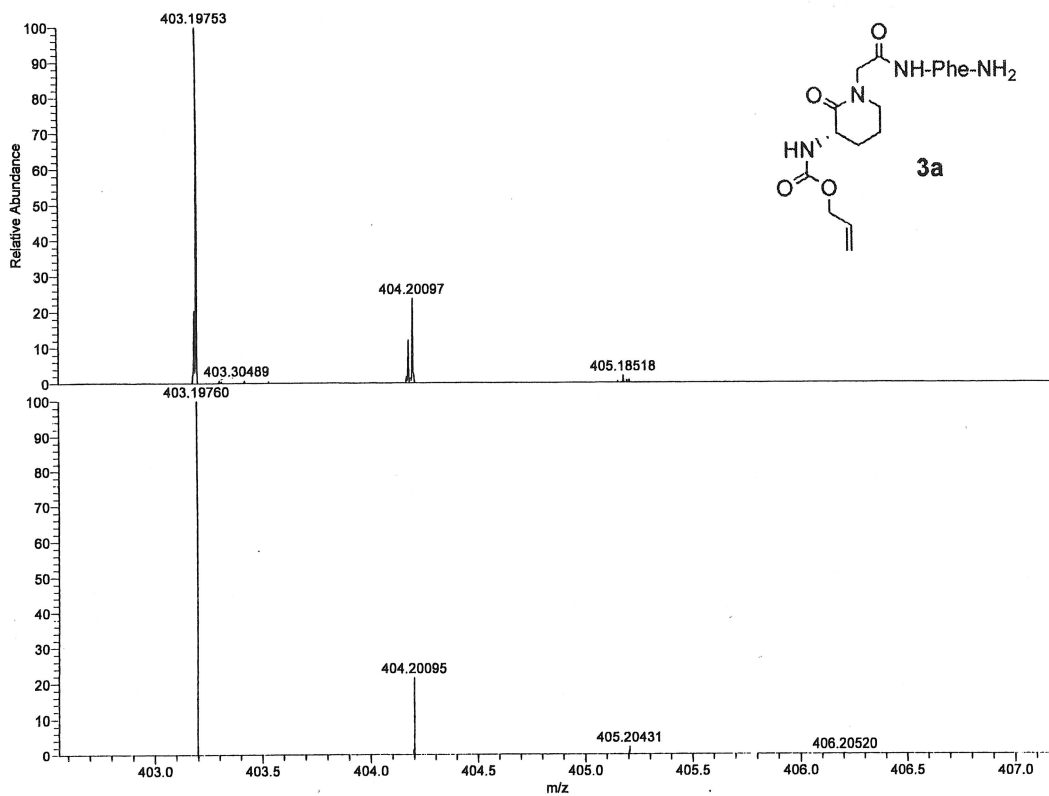

NL:  
1.50E8  
100525\_EP-  
223\_a#1 RT: 0.00  
AV: 1 T: FTMS + p  
NSI Full ms  
[100.00-1000.00]

NL:  
7.83E5  
C<sub>20</sub>H<sub>28</sub>N<sub>4</sub>O<sub>5</sub> +H:  
C<sub>20</sub>H<sub>27</sub>N<sub>4</sub>O<sub>5</sub>  
pa Chrg 1

C:\Xcalibur\...1100526\_EP-223\_b  
100526\_EP-223\_b

5/26/2010 5:27:38 PM

100526\_EP-223\_b

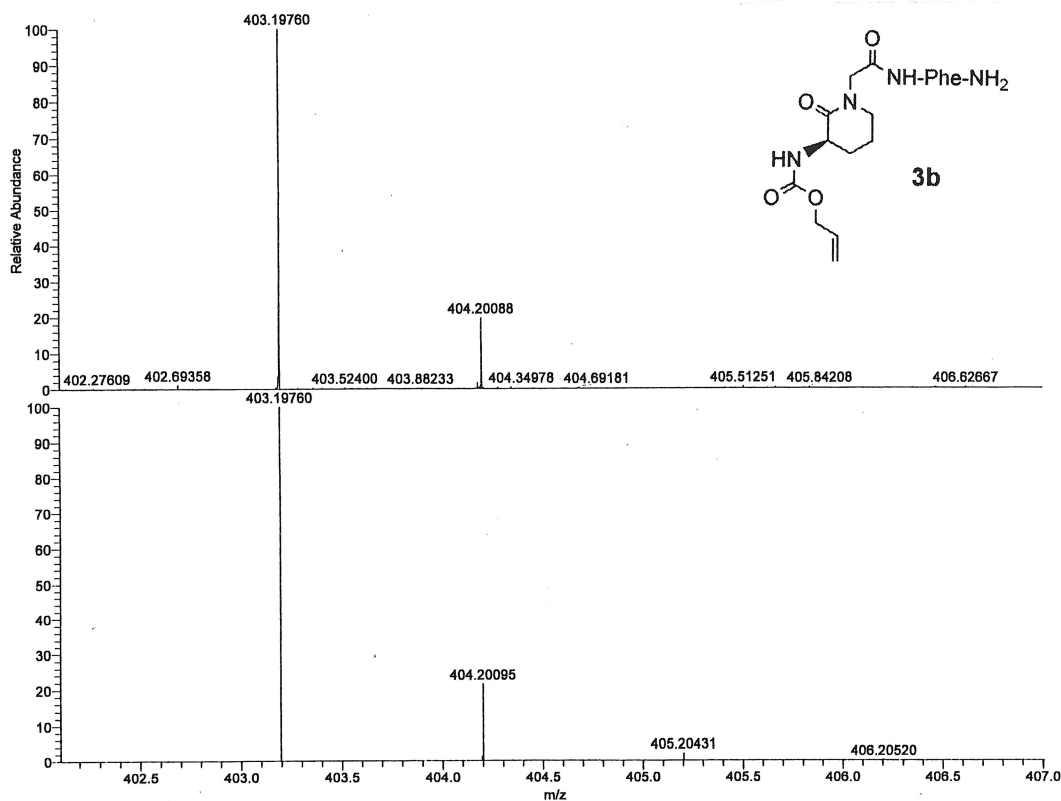

NL:  
1.03E8  
100526\_EP-223\_b#6-  
59 RT: 0.14-1.62  
AV: 54 T: FTMS + p  
NSI Full ms  
[200.00-2000.00]

NL:  
7.83E5  
C<sub>20</sub>H<sub>28</sub>N<sub>4</sub>O<sub>5</sub> +H:  
C<sub>20</sub>H<sub>27</sub>N<sub>4</sub>O<sub>5</sub>  
pa Chrg 1

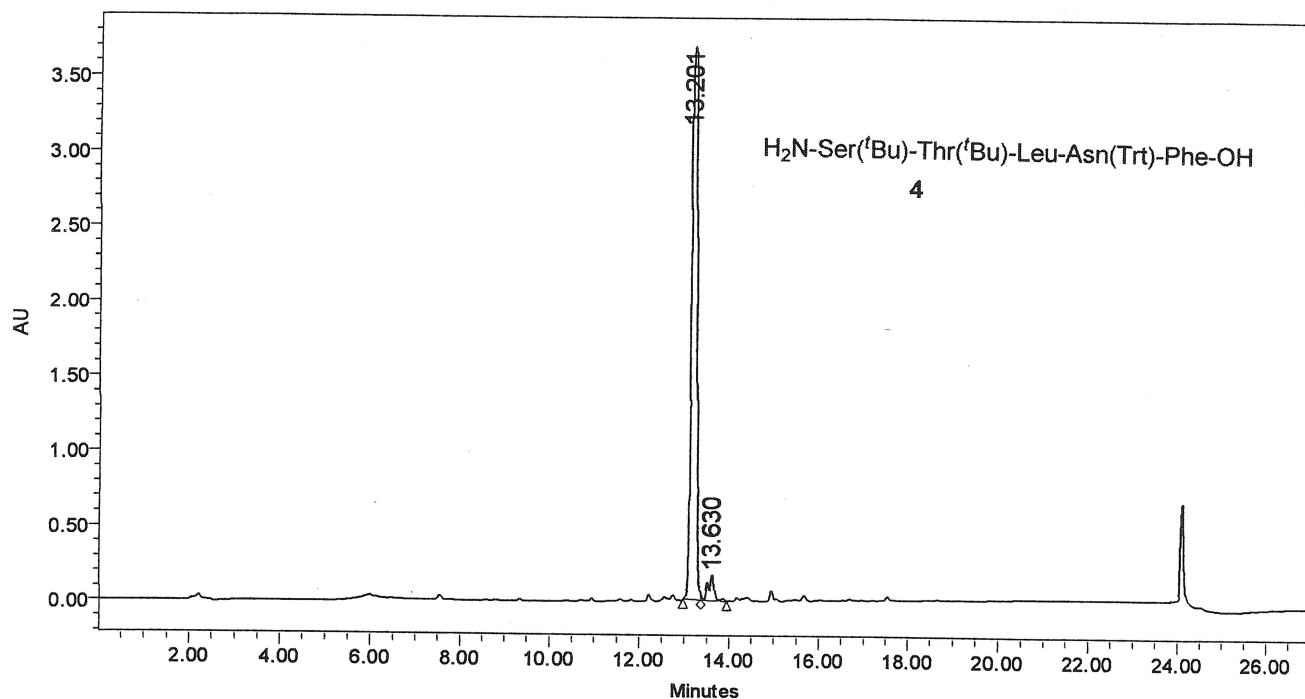

|   | RT<br>(min) | Area<br>( $\mu\text{V}\cdot\text{sec}$ ) | % Area | Height<br>( $\mu\text{V}$ ) | % Height |
|---|-------------|------------------------------------------|--------|-----------------------------|----------|
| 1 | 13.201      | 32746225                                 | 95.27  | 3689281                     | 95.56    |
| 2 | 13.630      | 1624611                                  | 4.73   | 171277                      | 4.44     |

C:\Xcalibur\100525\_EP-C1\_3bis  
100525\_EP-C1\_3bis

5/26/2010 2:43:12 PM

100525\_EP-C1\_3bis

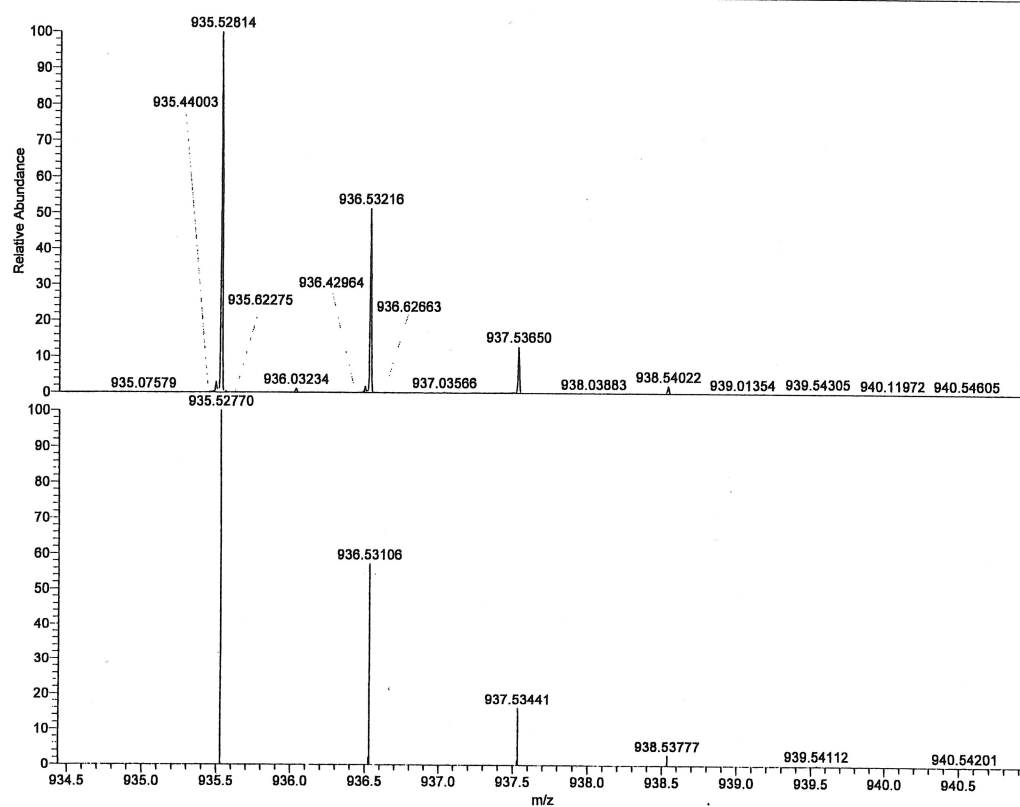

NL:  
6.80E6  
100525\_EP-  
C1\_3bis#17-81 RT:  
0.45-2.25 AV: 65 T:  
FTMS + p NSI Full ms  
[200.00-2000.00]

NL:  
5.37E5  
C<sub>53</sub>H<sub>70</sub>N<sub>8</sub>O<sub>8</sub>+H:  
C<sub>53</sub>H<sub>71</sub>N<sub>8</sub>O<sub>8</sub>  
pa Chrg 1

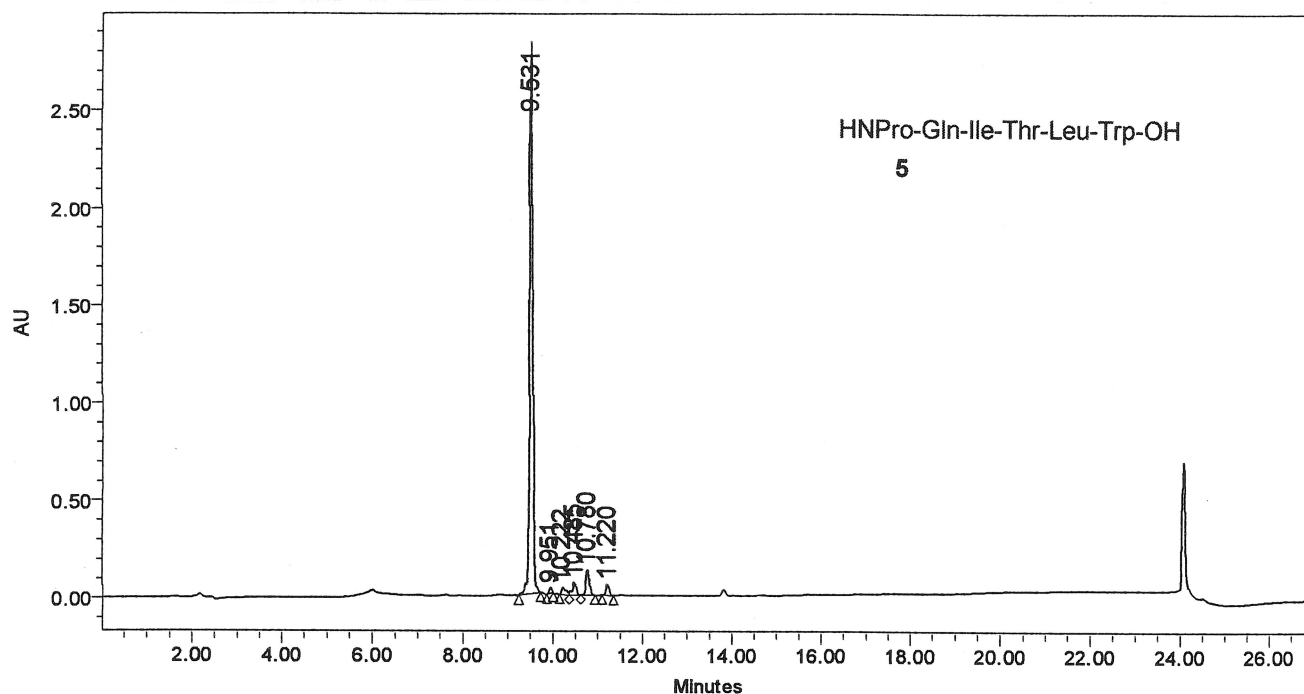

|   | RT<br>(min) | Area<br>( $\mu\text{V}\cdot\text{sec}$ ) | % Area | Height<br>( $\mu\text{V}$ ) | % Height |
|---|-------------|------------------------------------------|--------|-----------------------------|----------|
| 1 | 9.531       | 14155639                                 | 88.94  | 2853021                     | 89.97    |
| 2 | 9.951       | 122610                                   | 0.77   | 28280                       | 0.89     |
| 3 | 10.222      | 269670                                   | 1.69   | 37675                       | 1.19     |
| 4 | 10.485      | 371147                                   | 2.33   | 64155                       | 2.02     |
| 5 | 10.780      | 715466                                   | 4.50   | 129831                      | 4.09     |
| 6 | 11.220      | 281291                                   | 1.77   | 58158                       | 1.83     |

C:\Xcalibur\...100525\_EP-N1

5/25/2010 7:01:35 PM

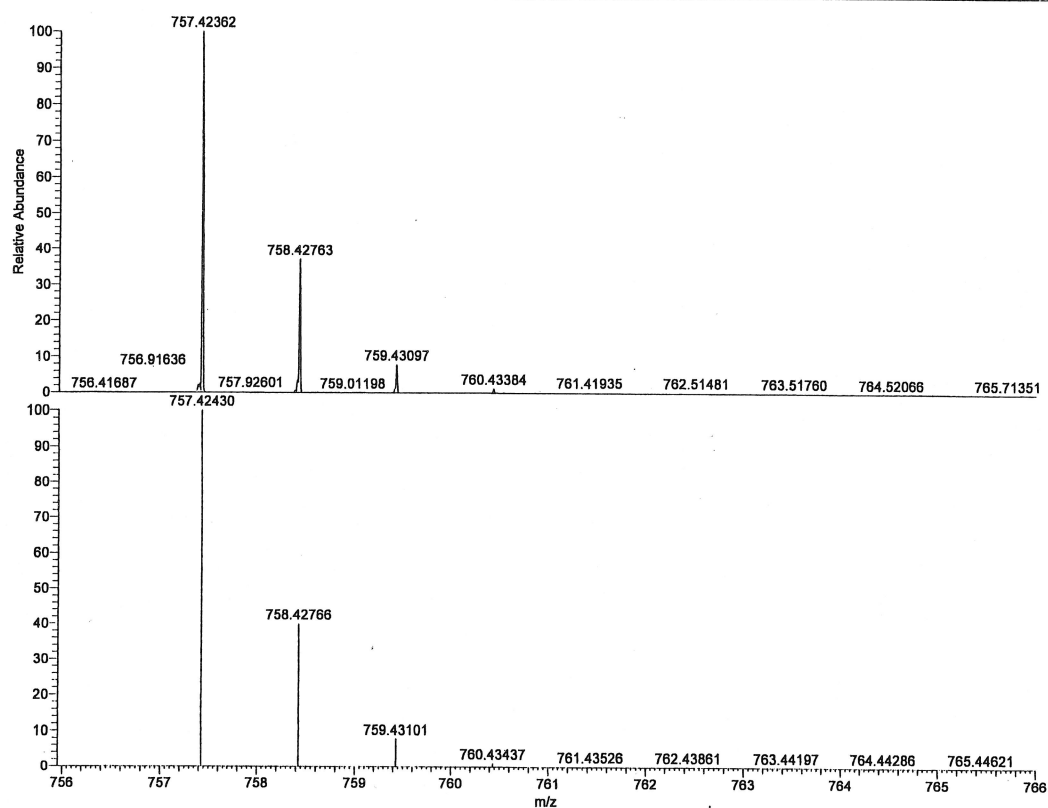

NL:  
2.41E6  
100525\_EP-N1#38-  
189 RT: 0.58-2.88  
AV: 152 T: FTMS + p  
NSI Full ms  
[100.00-1000.00]

NL:  
6.34E5  
PQITLW +H +H<sub>2</sub>O:  
C<sub>37</sub>H<sub>57</sub>N<sub>5</sub>O<sub>9</sub>  
pa Chrg 1

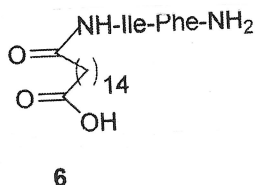

|   | RT<br>(min) | Area<br>( $\mu\text{V}\cdot\text{sec}$ ) | % Area | Height<br>( $\mu\text{V}$ ) |
|---|-------------|------------------------------------------|--------|-----------------------------|
| 1 | 13.611      | 249224                                   | 8.72   | 45487                       |
| 2 | 14.915      | 2162121                                  | 75.61  | 371125                      |
| 3 | 15.184      | 448356                                   | 15.68  | 30124                       |

5/25/2010 7:13:22 PM

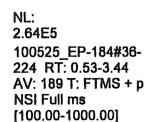

NL:  
6.96E5  
C<sub>31</sub> h<sub>51</sub> n<sub>3</sub> o<sub>5</sub> +H:  
C<sub>31</sub> H<sub>52</sub> N<sub>3</sub> O<sub>5</sub>  
pa Chrg 1

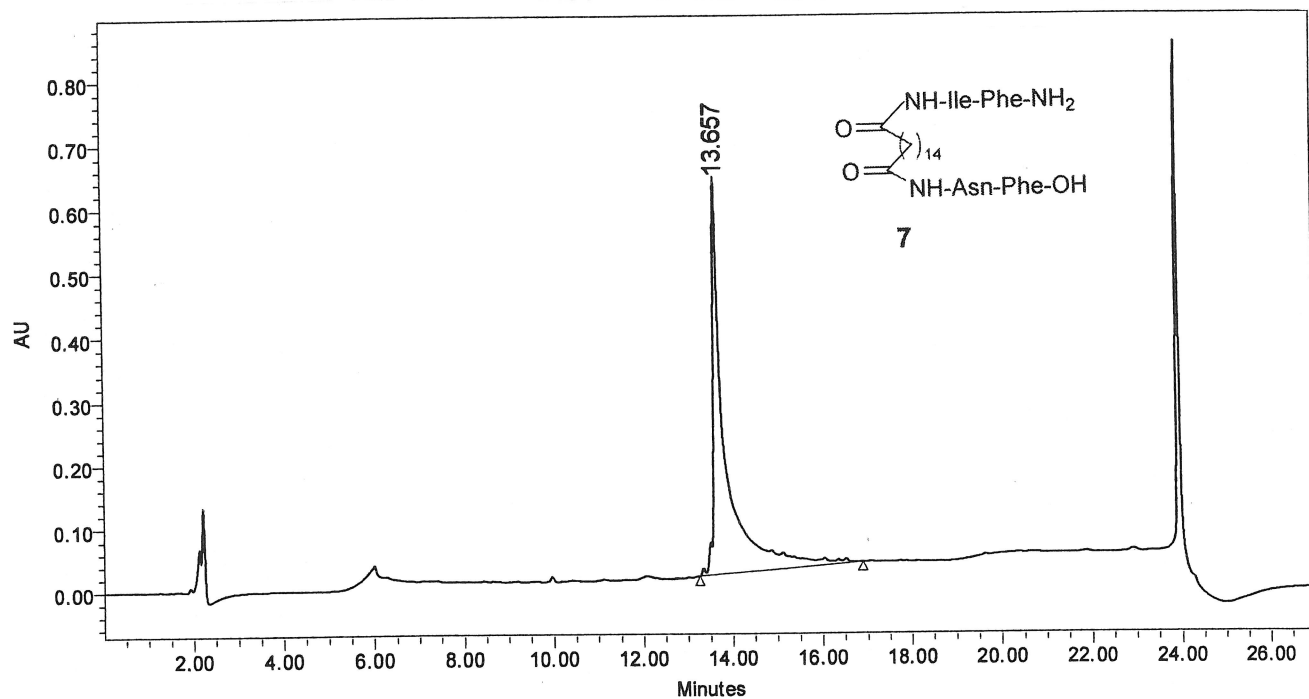

|   | RT<br>(min) | Area<br>( $\mu\text{V}\cdot\text{sec}$ ) | % Area | Height<br>( $\mu\text{V}$ ) | % Height |
|---|-------------|------------------------------------------|--------|-----------------------------|----------|
| 1 | 13.657      | 11706244                                 | 100.00 | 625670                      | 100.00   |

100526\_EP-186\_p\_100526163726  
100526\_EP-186\_p

5/26/2010 4:37:26 PM

100526\_EP-186\_p

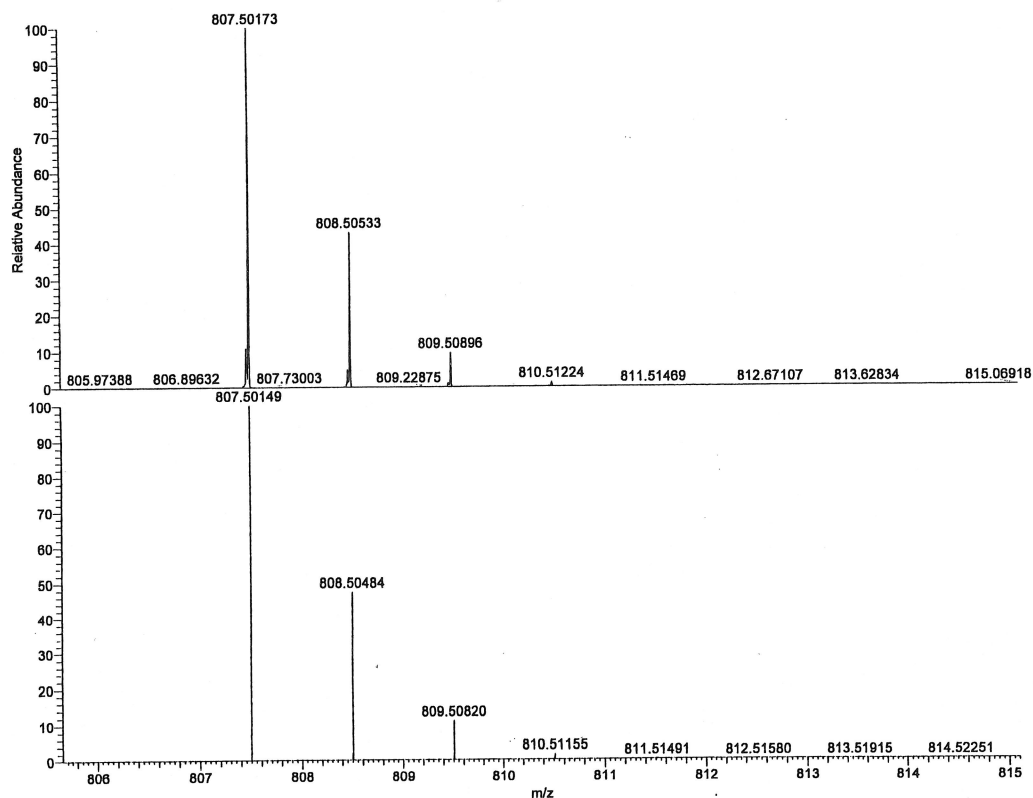

NL:  
8.13E5  
100526\_EP-  
186\_p\_100526163726#3-  
32 RT: 0.06-0.87 AV: 30  
T: FTMS + p NSI Full ms  
[200.00-2000.00]

NL:  
5.93E5  
C<sub>44</sub>H<sub>66</sub>N<sub>6</sub>O<sub>8</sub>+H:  
C<sub>44</sub>H<sub>67</sub>N<sub>6</sub>O<sub>8</sub>  
pa Chrg 1

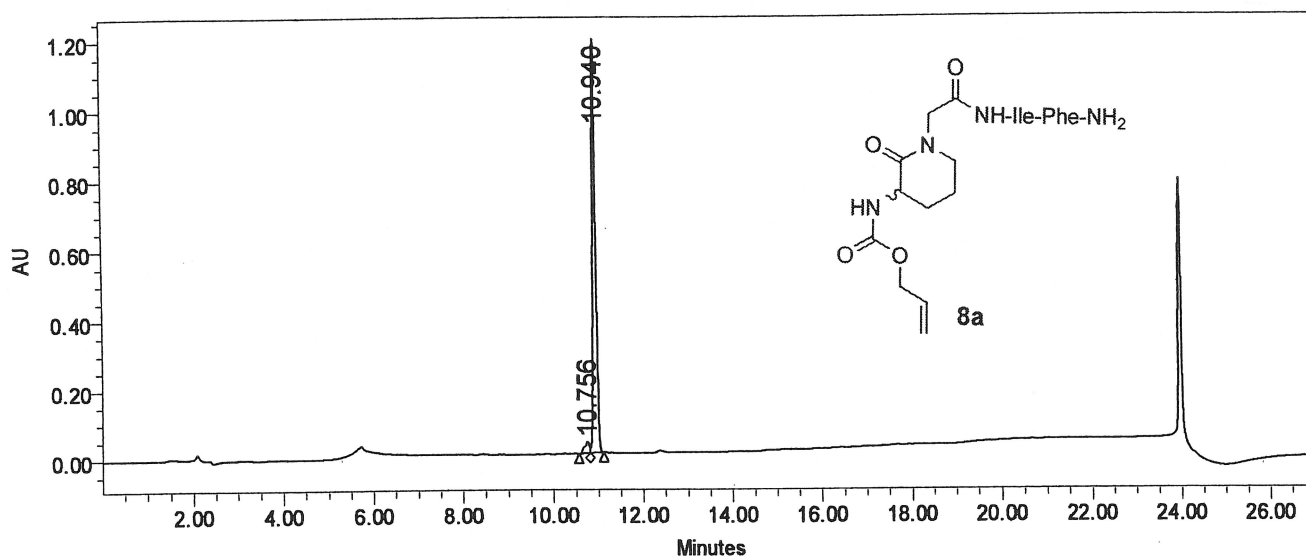

|   | RT<br>(min) | Area<br>( $\mu\text{V}\cdot\text{sec}$ ) | % Area | Height<br>( $\mu\text{V}$ ) |
|---|-------------|------------------------------------------|--------|-----------------------------|
| 1 | 10.756      | 245752                                   | 3.97   | 32751                       |
| 2 | 10.940      | 5939609                                  | 96.03  | 1192920                     |

Z:\data\...\100525\_EP-244\_a

5/25/2010 7:19:16 PM

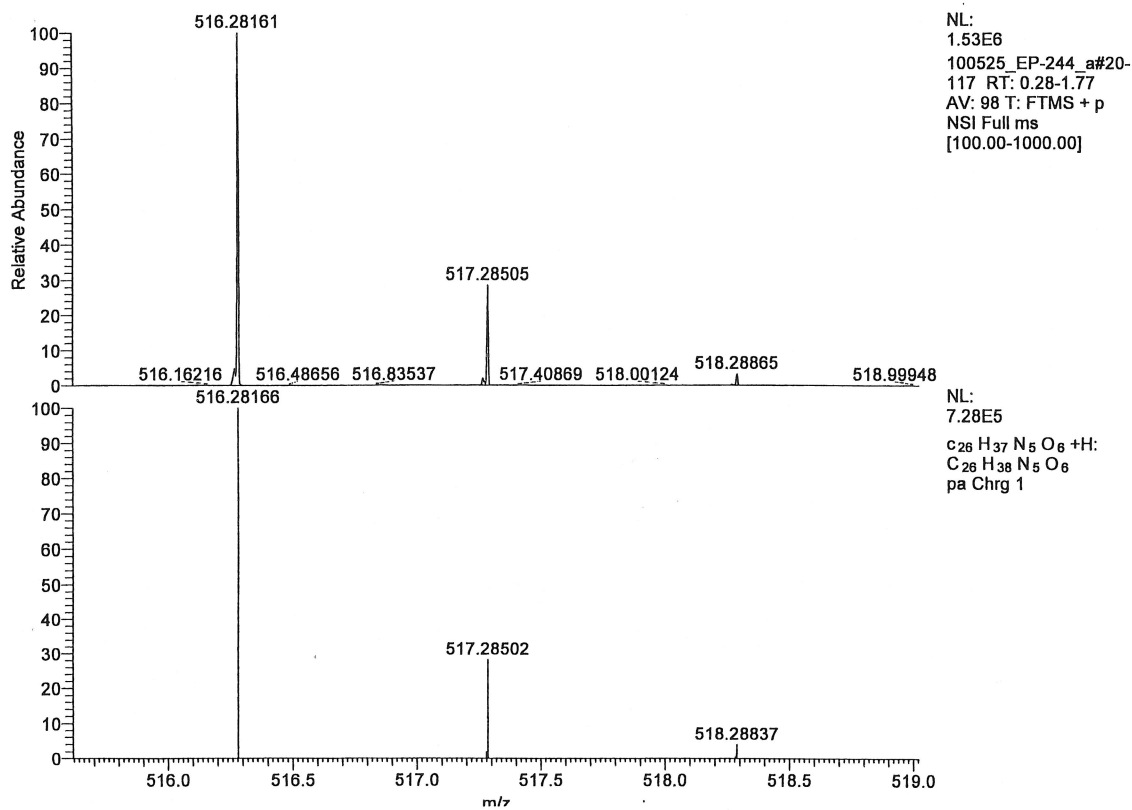

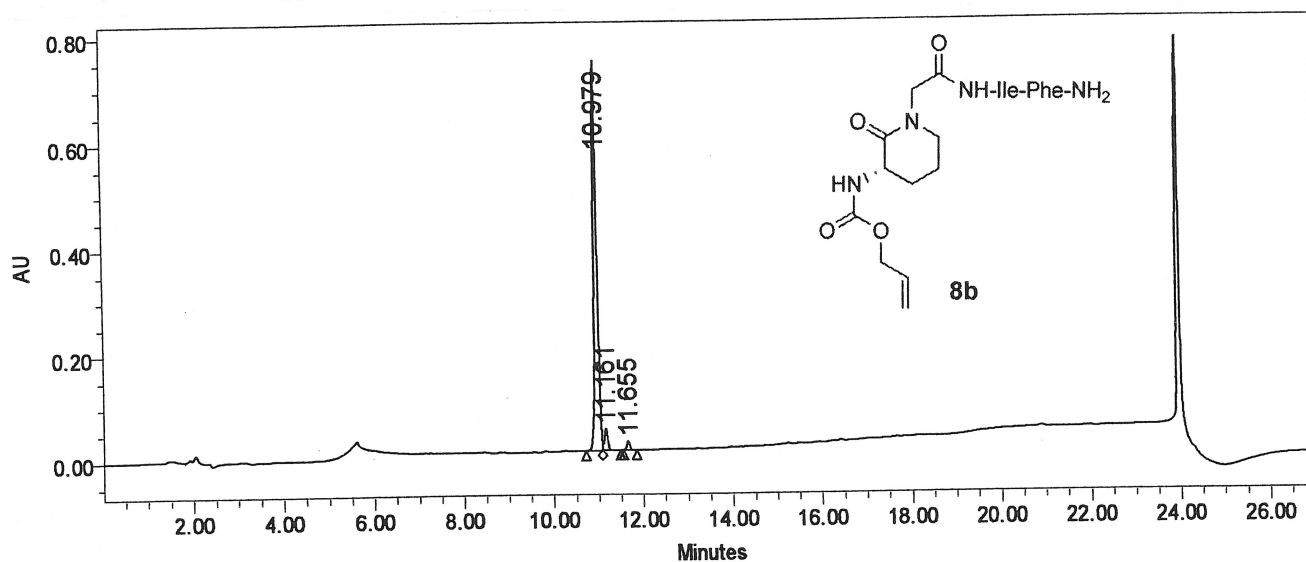

|   | RT<br>(min) | Area<br>( $\mu\text{V}\cdot\text{sec}$ ) | % Area | Height<br>( $\mu\text{V}$ ) |
|---|-------------|------------------------------------------|--------|-----------------------------|
| 1 | 10.979      | 3815145                                  | 92.81  | 730575                      |
| 2 | 11.161      | 217374                                   | 5.29   | 41231                       |
| 3 | 11.655      | 78286                                    | 1.90   | 16480                       |

Z:\data\...100525\_EP-244\_b

5/25/2010 1:25:11 PM

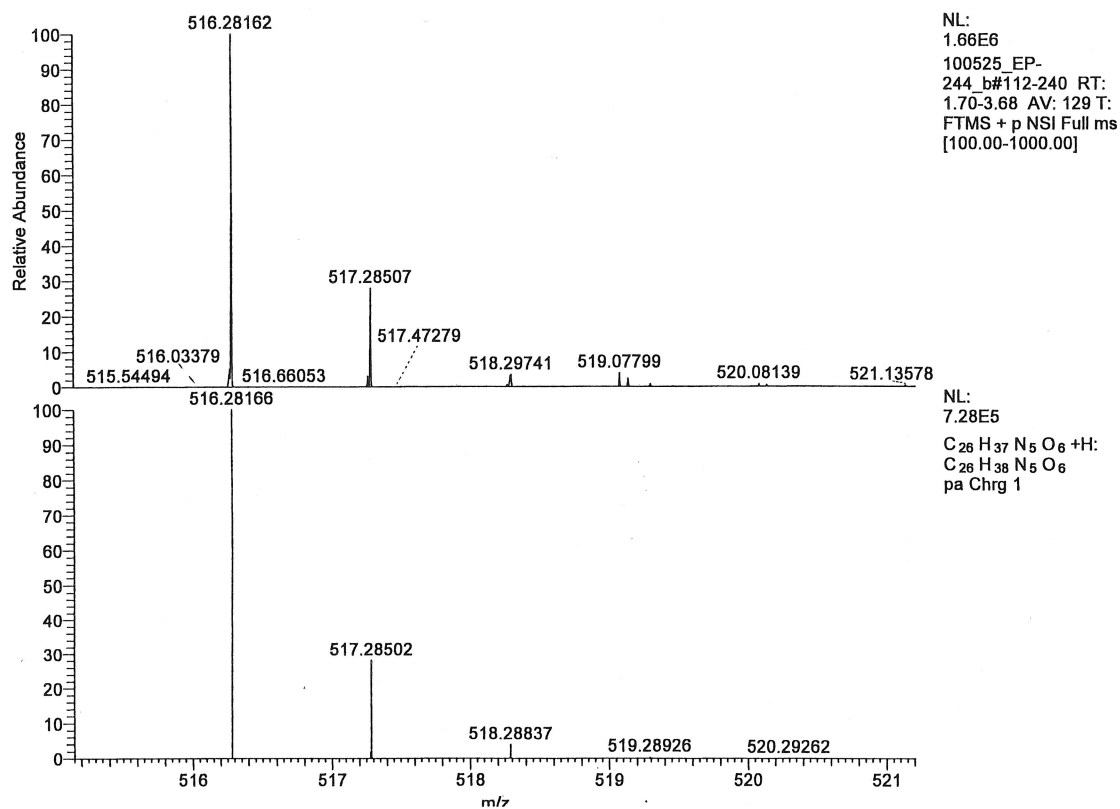



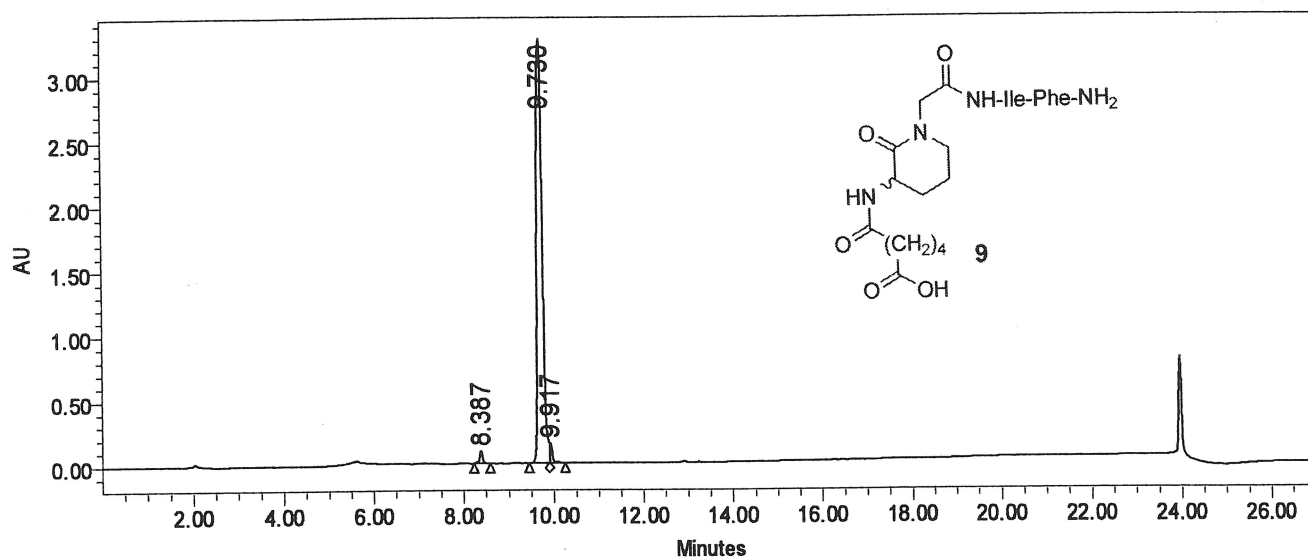

|   | RT<br>(min) | Area<br>( $\mu\text{V}\cdot\text{sec}$ ) | % Area | Height<br>( $\mu\text{V}$ ) |
|---|-------------|------------------------------------------|--------|-----------------------------|
| 1 | 8.387       | 444367                                   | 1.54   | 94518                       |
| 2 | 9.730       | 27827580                                 | 96.24  | 3284641                     |
| 3 | 9.917       | 642270                                   | 2.22   | 154872                      |

C:\Xcalibur\...100525\_EP-264

5/25/2010 7:31:08 PM

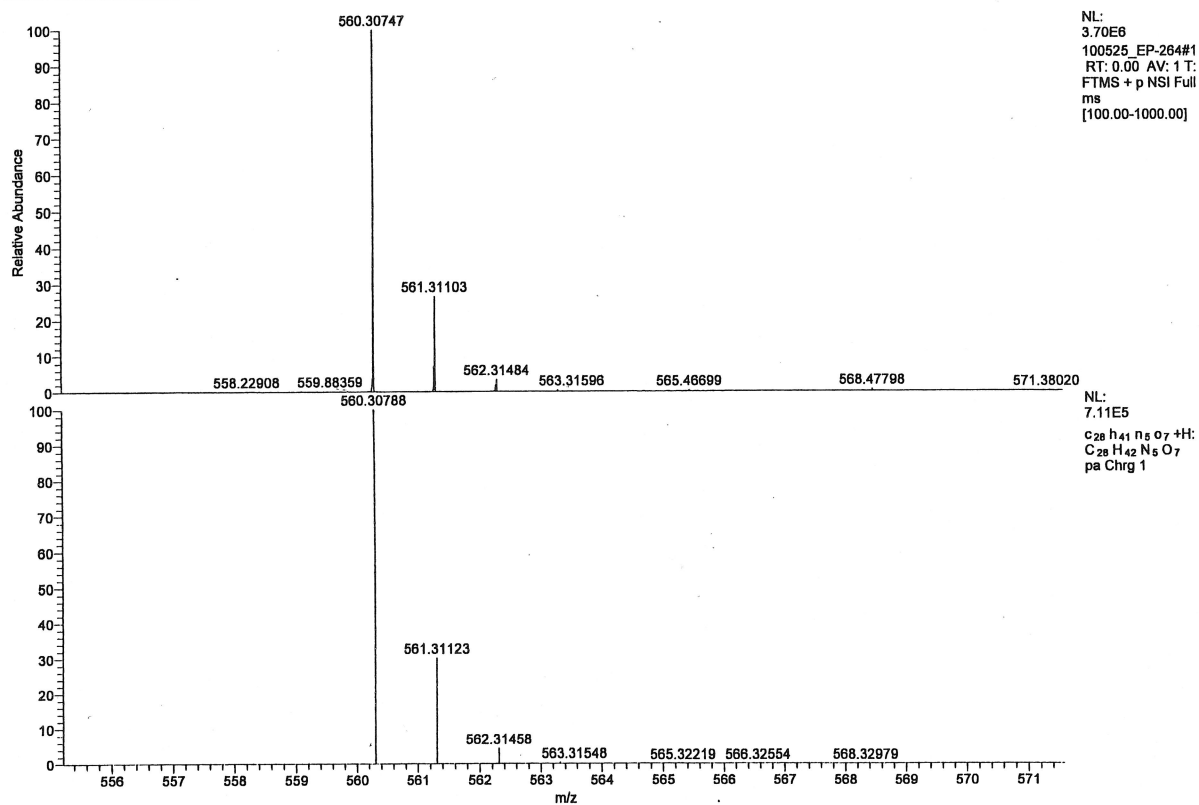

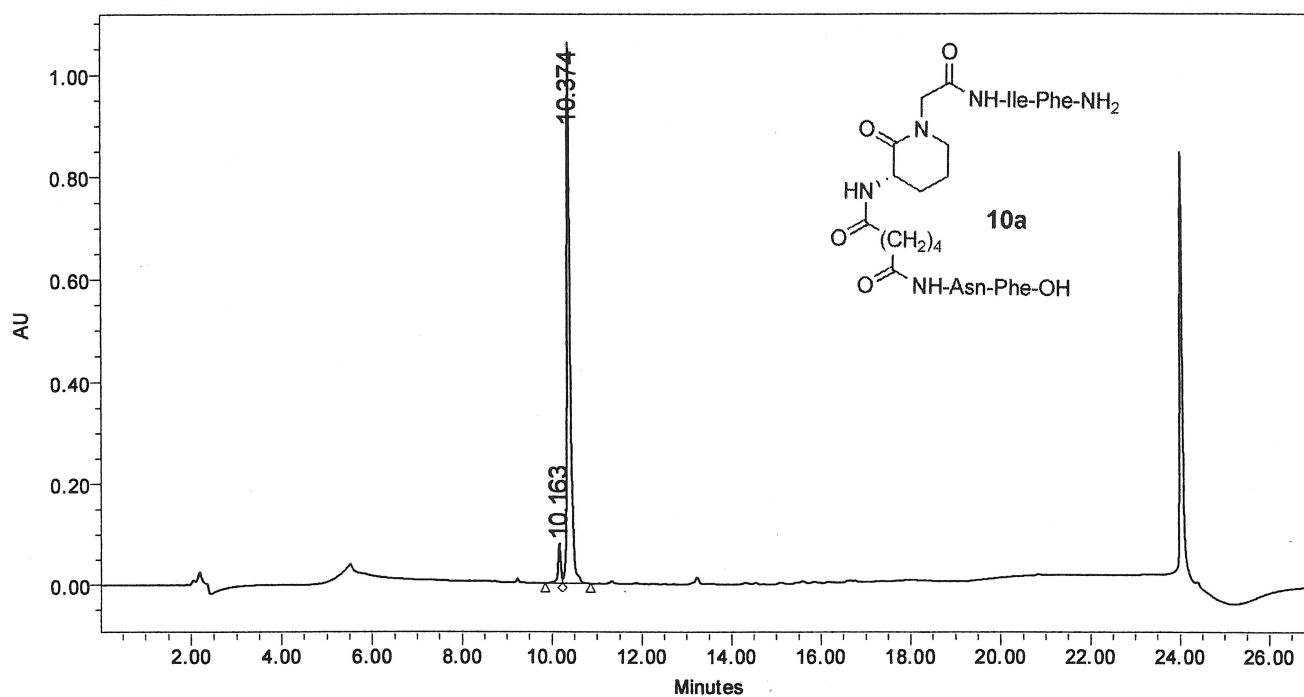

|   | RT<br>(min) | Area<br>( $\mu\text{V}\cdot\text{sec}$ ) | % Area | Height<br>( $\mu\text{V}$ ) | % Height |
|---|-------------|------------------------------------------|--------|-----------------------------|----------|
| 1 | 10.163      | 335501                                   | 5.79   | 77014                       | 6.81     |
| 2 | 10.374      | 5455413                                  | 94.21  | 1054629                     | 93.19    |

C:\Xcalibur\100526\_EP-245\_a  
100526\_EP-245\_a

5/26/2010 4:44:20 PM

100526\_EP-245\_a

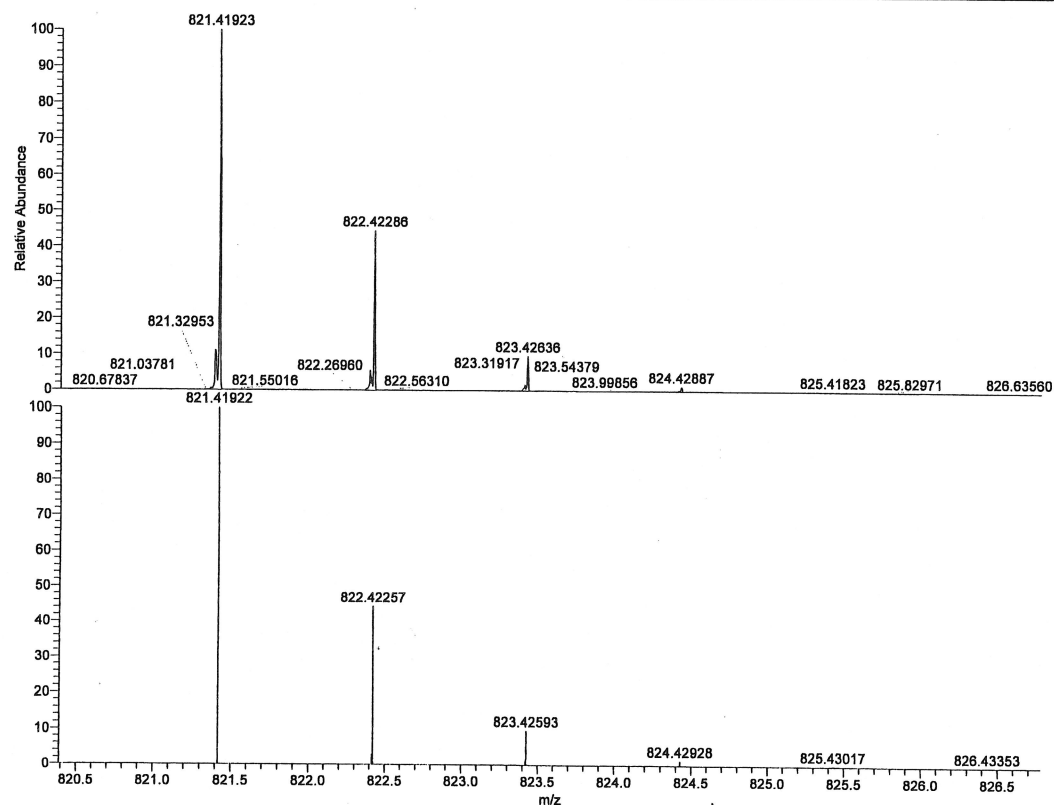

NL:  
2.19E8  
100526\_EP-245\_a#9-  
42 RT: 0.22-1.15  
AV: 34 T: FTMS + p  
NSI Full ms  
[200.00-2000.00]

NL:  
6.08E5  
 $\text{C}_{41}\text{H}_{56}\text{N}_8\text{O}_{10}^+ \text{H}^+$   
 $\text{C}_{41}\text{H}_{57}\text{N}_8\text{O}_{10}$   
pa Chrg 1

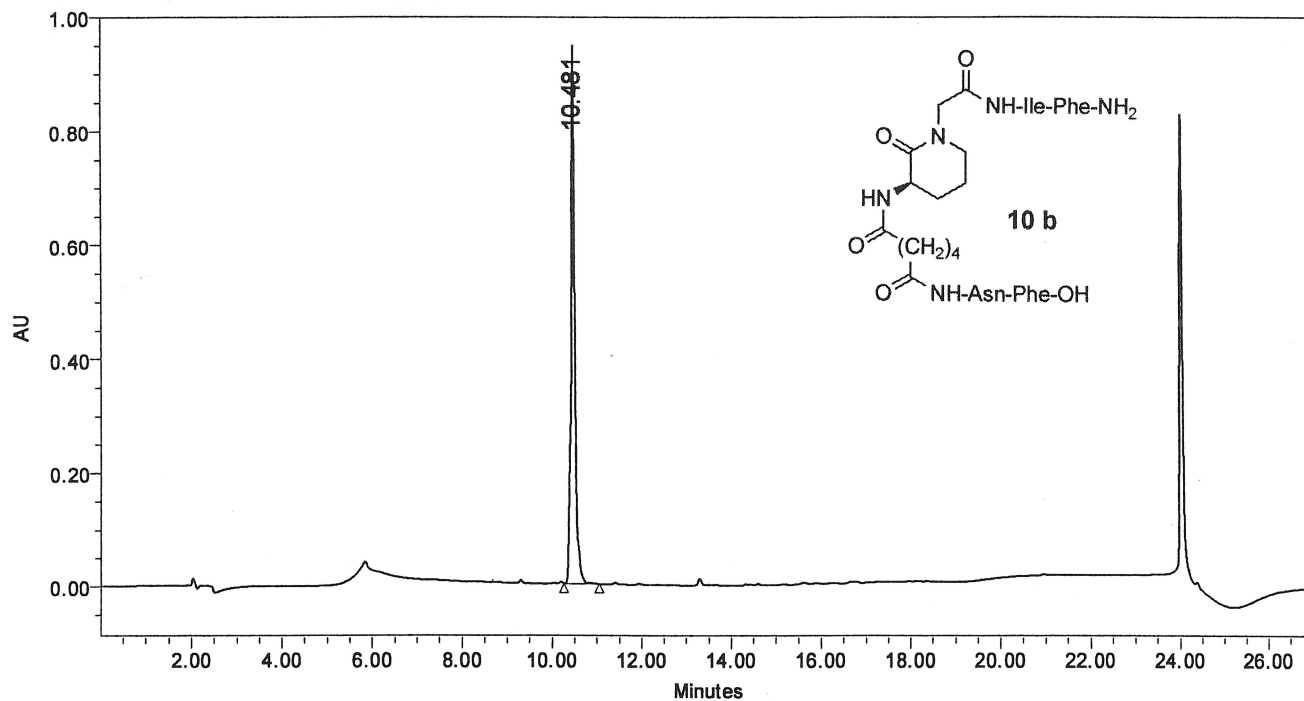

|   | RT<br>(min) | Area<br>( $\mu\text{V}\cdot\text{sec}$ ) | % Area | Height<br>( $\mu\text{V}$ ) | % Height |
|---|-------------|------------------------------------------|--------|-----------------------------|----------|
| 1 | 10.481      | 5557542                                  | 100.00 | 928108                      | 100.00   |

C:\Xcalibur\...100526\_EP-245\_b  
100526\_EP-245\_b

5/26/2010 4:50:10 PM

100526\_EP-245\_b

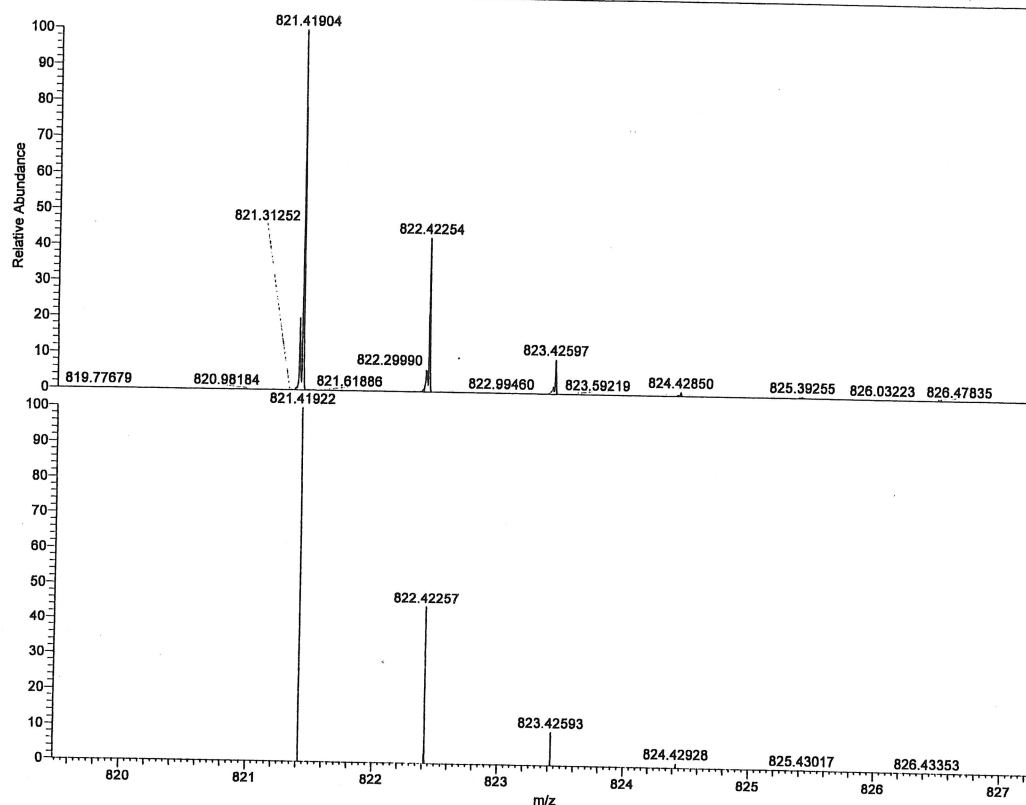

NL:  
4.29E6  
100526\_EP-245\_b#7-  
51 RT: 0.17-1.40  
AV: 45 T: FTMS + p  
NSI Full ms  
[200.00-2000.00]

NL:  
6.06E5  
C<sub>41</sub>H<sub>58</sub>N<sub>8</sub>O<sub>10</sub> +H:  
C<sub>41</sub>H<sub>57</sub>N<sub>8</sub>O<sub>10</sub>  
pa Chrg 1

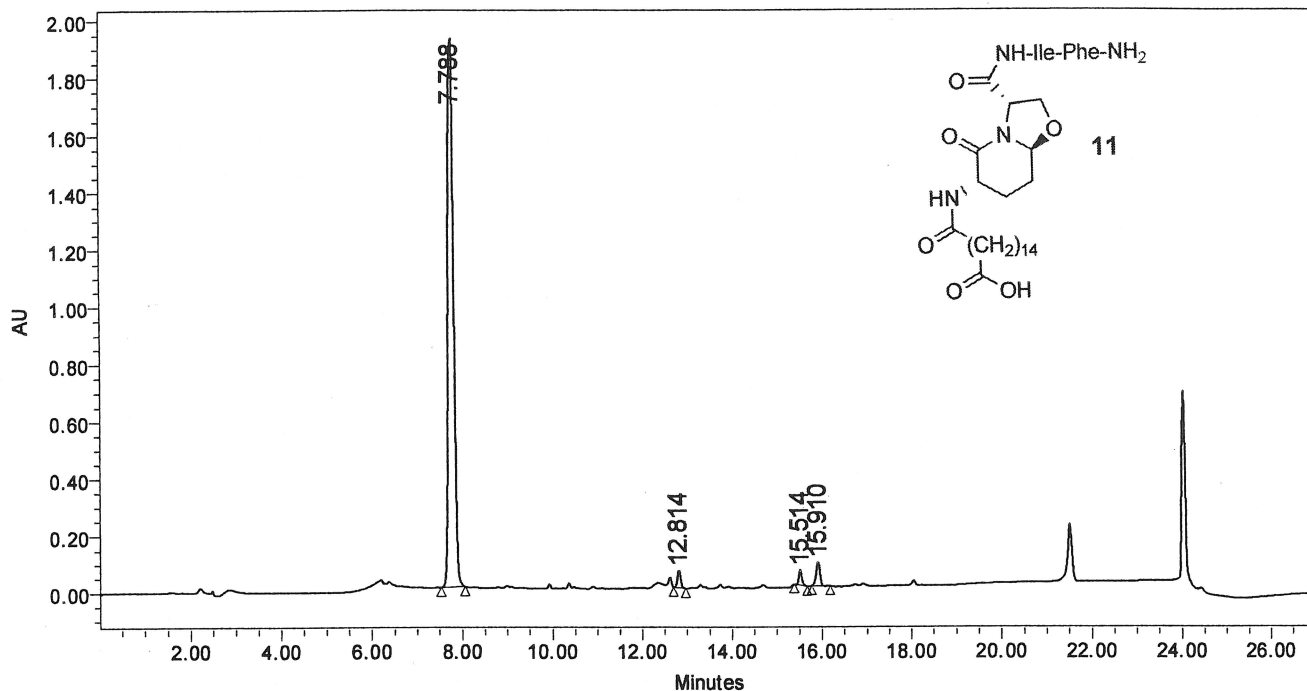

|   | RT<br>(min) | Area<br>( $\mu\text{V}\cdot\text{sec}$ ) | % Area | Height<br>( $\mu\text{V}$ ) | % Height |
|---|-------------|------------------------------------------|--------|-----------------------------|----------|
| 1 | 7.788       | 16854006                                 | 94.17  | 1951498                     | 90.88    |
| 2 | 12.814      | 299113                                   | 1.67   | 59479                       | 2.77     |
| 3 | 15.514      | 246263                                   | 1.38   | 52268                       | 2.43     |
| 4 | 15.910      | 497880                                   | 2.78   | 84106                       | 3.92     |

C:\Xcalibur\...100525\_EP-237

5/25/2010 7:37:01 PM

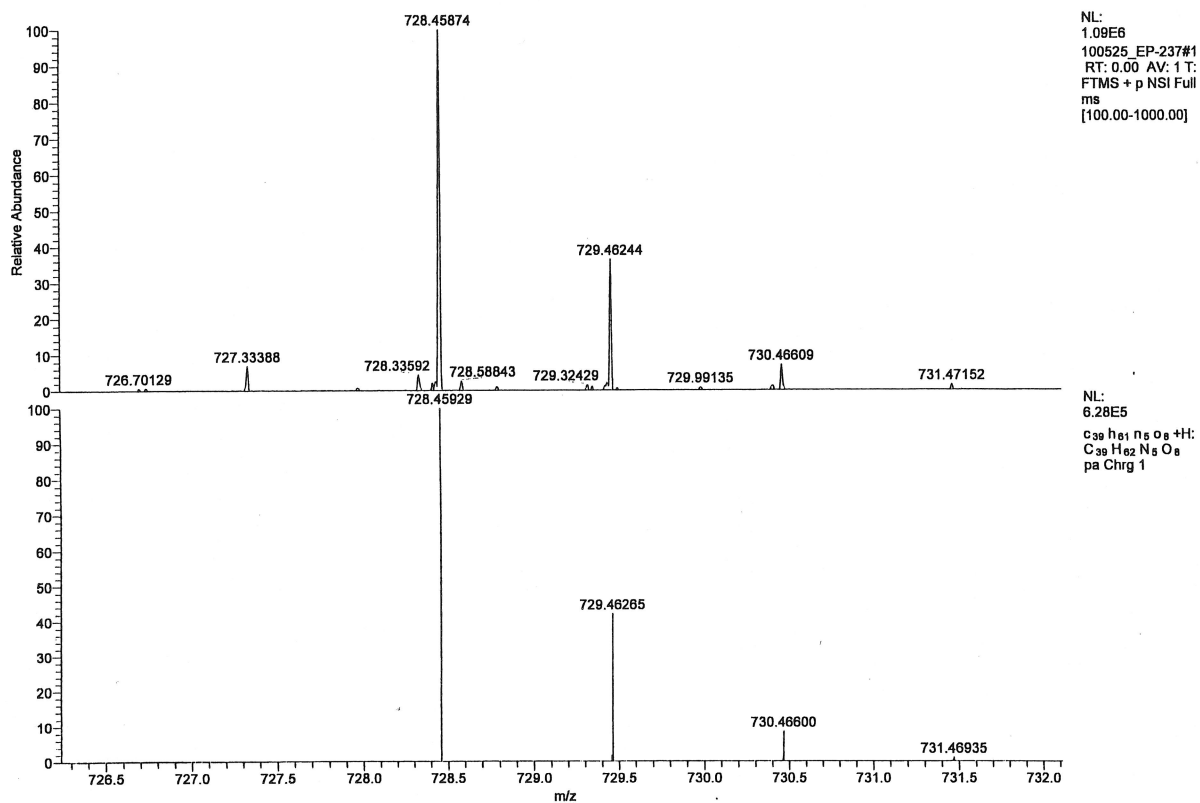

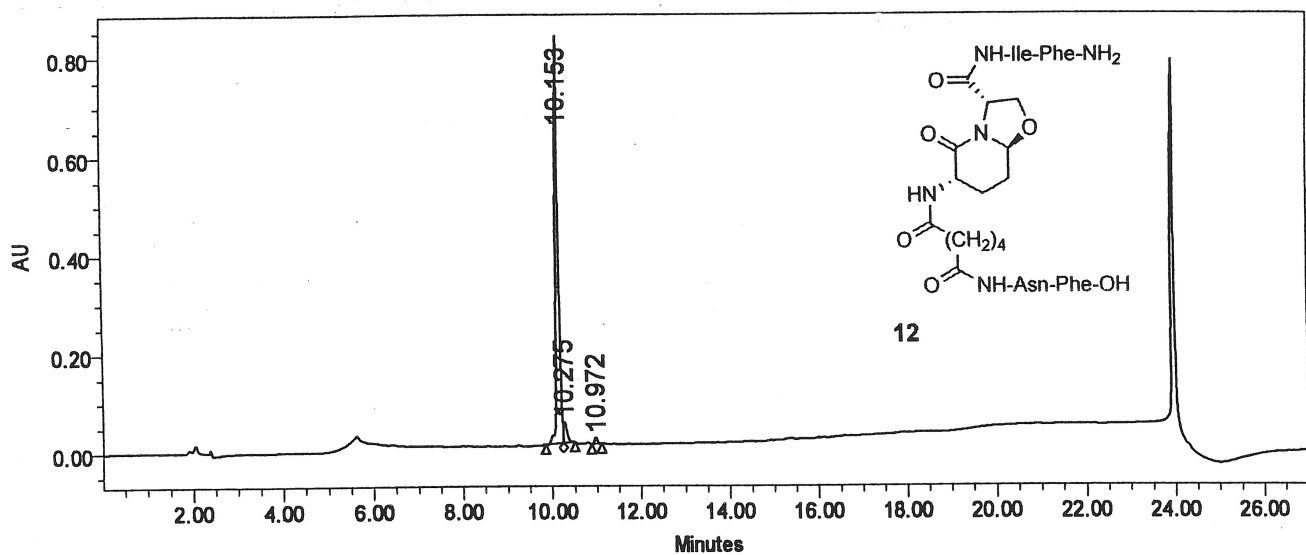

|   | RT<br>(min) | Area<br>( $\mu\text{V}\cdot\text{sec}$ ) | % Area | Height<br>( $\mu\text{V}$ ) |
|---|-------------|------------------------------------------|--------|-----------------------------|
| 1 | 10.153      | 3791289                                  | 93.14  | 810276                      |
| 2 | 10.275      | 218889                                   | 5.38   | 41451                       |
| 3 | 10.972      | 60264                                    | 1.48   | 12799                       |

Applied Biosystems 4700 Proteomics Analyzer 347000059  
4700 Reflector Spec #1[BP = 786.4, 1412]

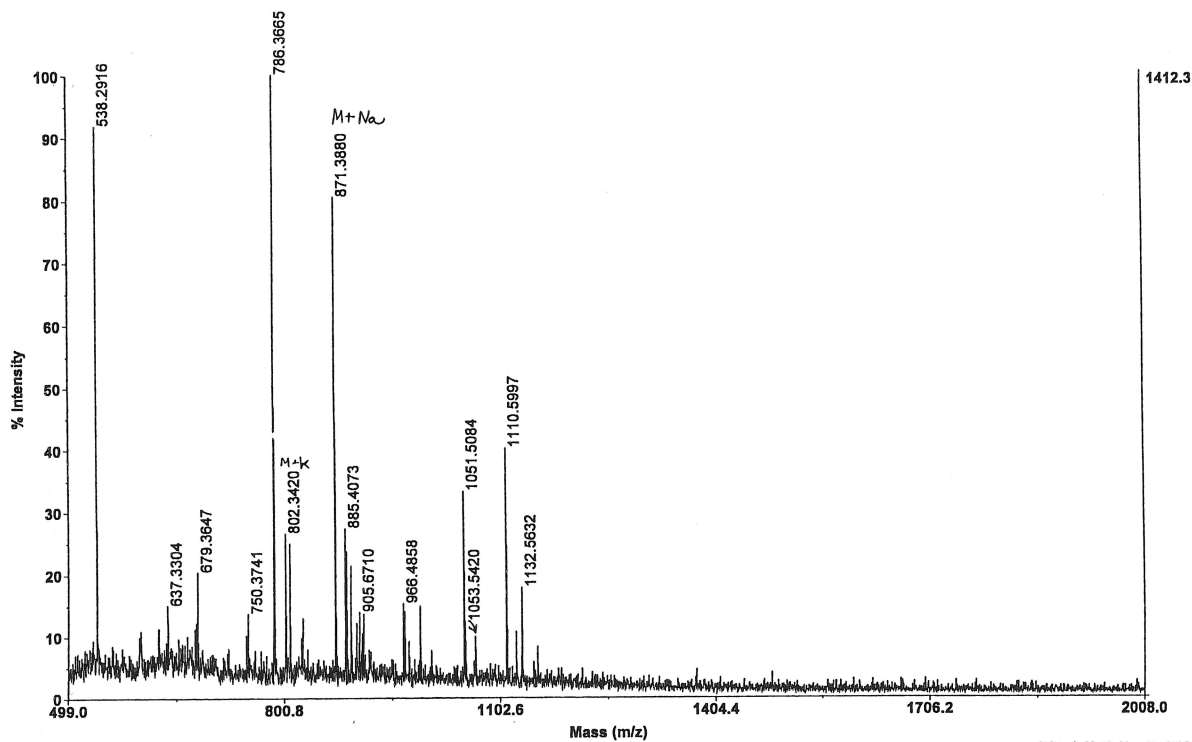

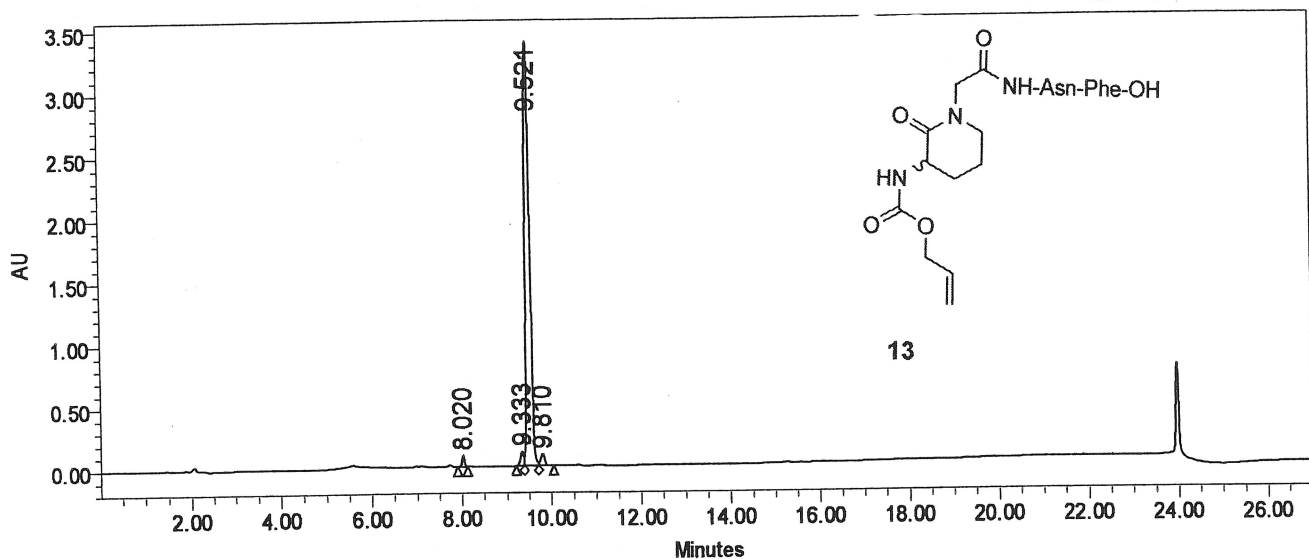

|   | RT<br>(min) | Area<br>( $\mu\text{V}\cdot\text{sec}$ ) | % Area | Height<br>( $\mu\text{V}$ ) |
|---|-------------|------------------------------------------|--------|-----------------------------|
| 1 | 8.020       | 344923                                   | 1.28   | 86578                       |
| 2 | 9.333       | 580780                                   | 2.16   | 112660                      |
| 3 | 9.521       | 25350726                                 | 94.38  | 3396601                     |
| 4 | 9.810       | 583583                                   | 2.17   | 95411                       |

C:\Xcalibur\...1100525\_EP-259

5/25/2010 7:42:56 PM

100525\_EP-259 #160-309 RT: 2.53-4.80 AV: 150 NL: 1.14E7  
T: FTMS + p NSI Full ms [100.00-1000.00]

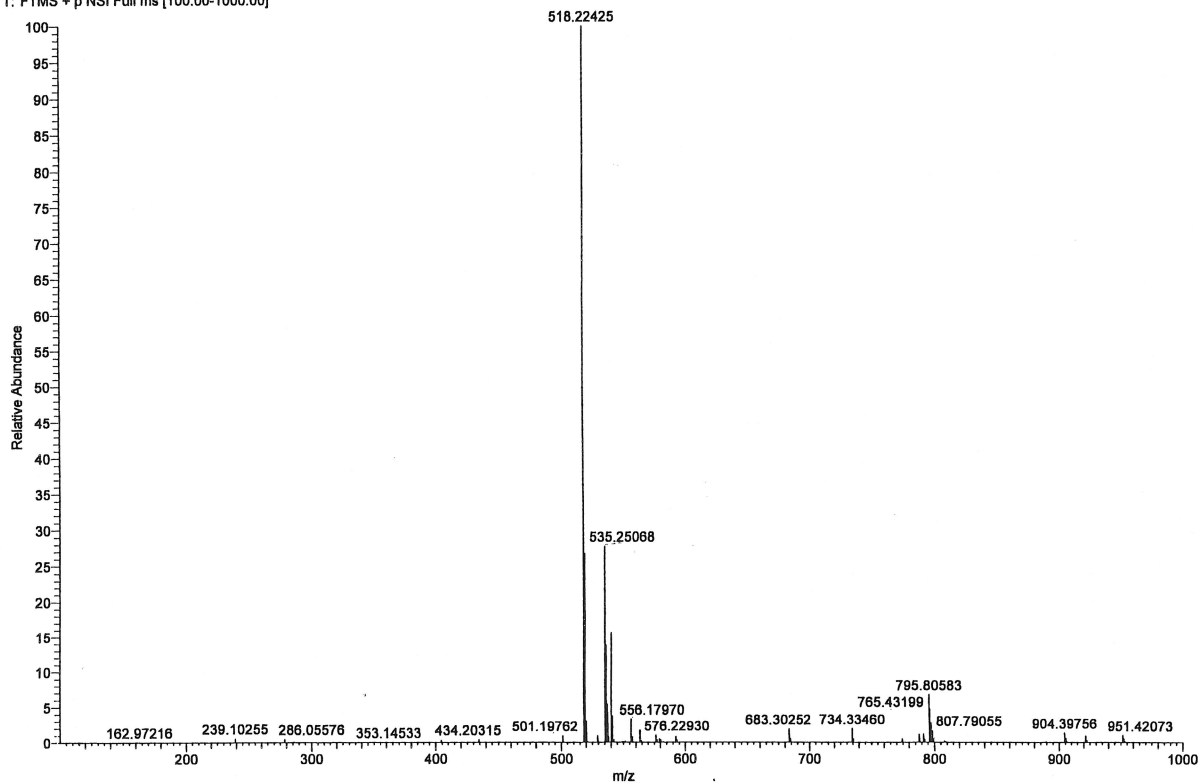

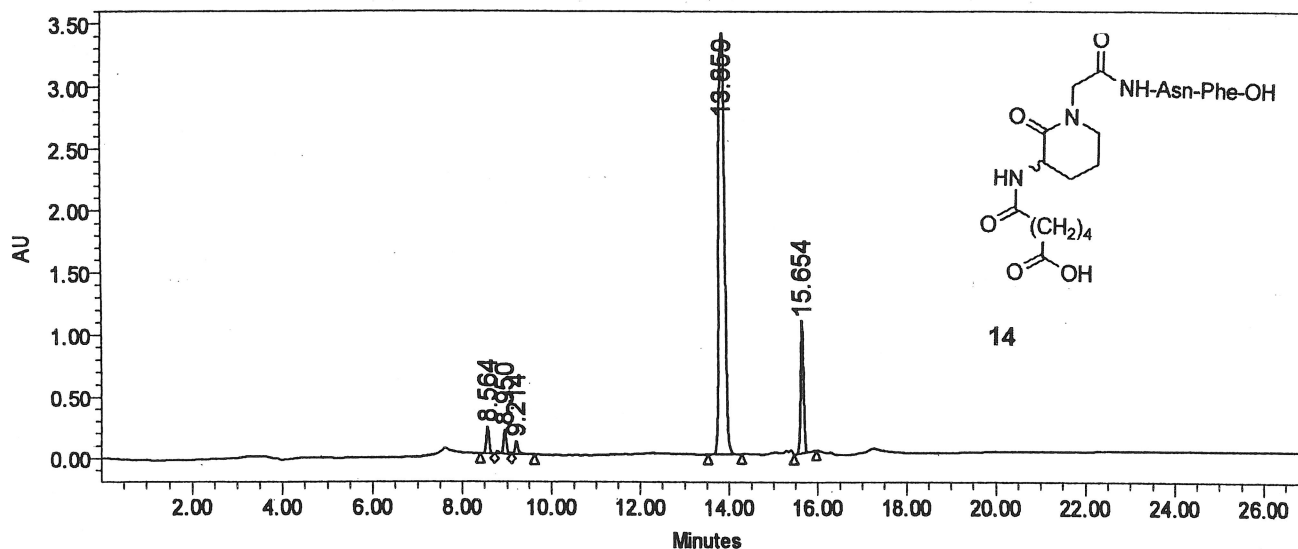

|   | RT (min) | Area (μV*sec) | % Area | Height (μV) |
|---|----------|---------------|--------|-------------|
| 1 | 8.564    | 940600        | 2.42   | 213587      |
| 2 | 8.950    | 938482        | 2.42   | 186957      |
| 3 | 9.214    | 533721        | 1.37   | 101471      |
| 4 | 13.859   | 31460676      | 81.00  | 3410503     |
| 5 | 15.654   | 4967638       | 12.79  | 1063396     |

Applied Biosystems 4700 Proteomics Analyzer 347000059

4700 Reflector Spec #1[BP = 584.2, 9872]

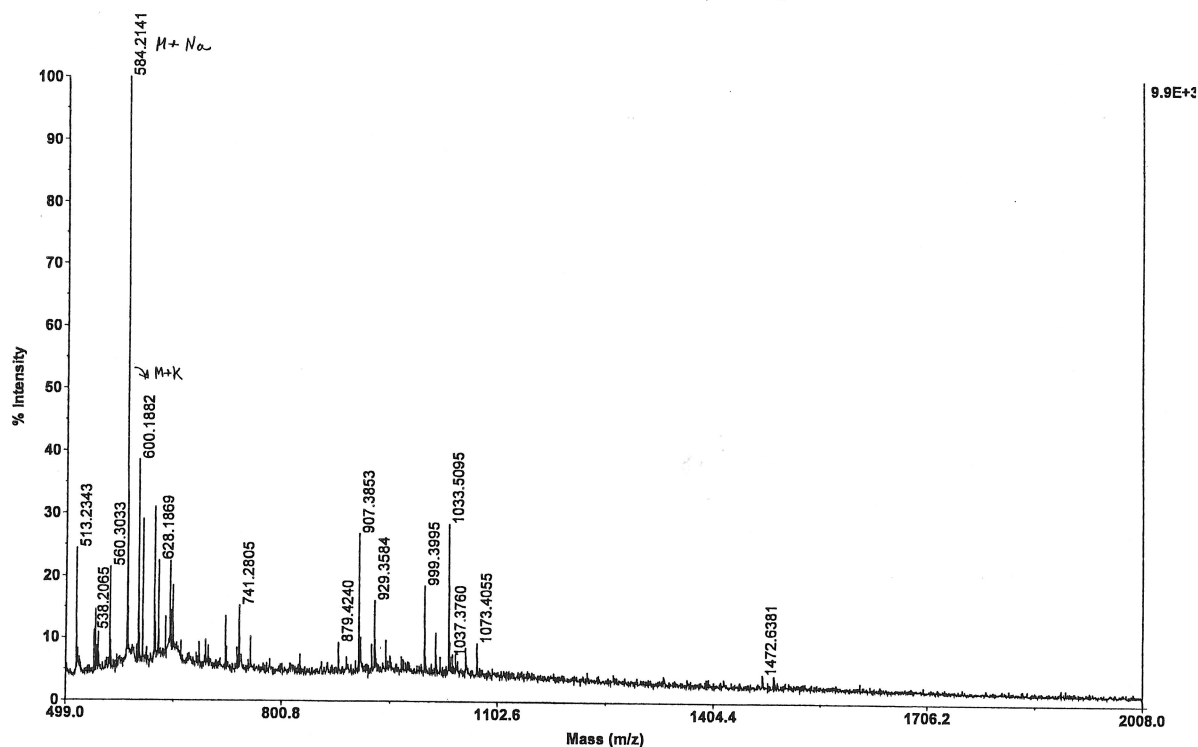

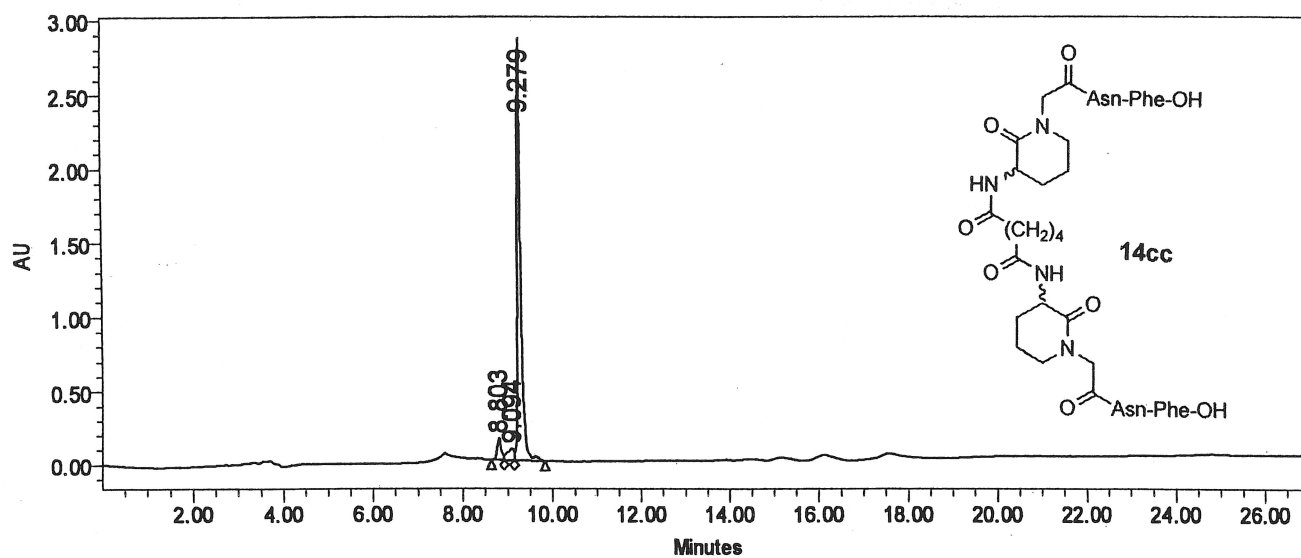

|   | RT<br>(min) | Area<br>( $\mu\text{V}\cdot\text{sec}$ ) | % Area | Height<br>( $\mu\text{V}$ ) |
|---|-------------|------------------------------------------|--------|-----------------------------|
| 1 | 8.803       | 928054                                   | 5.29   | 146927                      |
| 2 | 9.094       | 813905                                   | 4.64   | 81326                       |
| 3 | 9.279       | 15806622                                 | 90.07  | 2850049                     |

Applied Biosystems 4700 Proteomics Analyzer 347000059

4700 Reflector Spec #1[BP = 999.4, 9354]

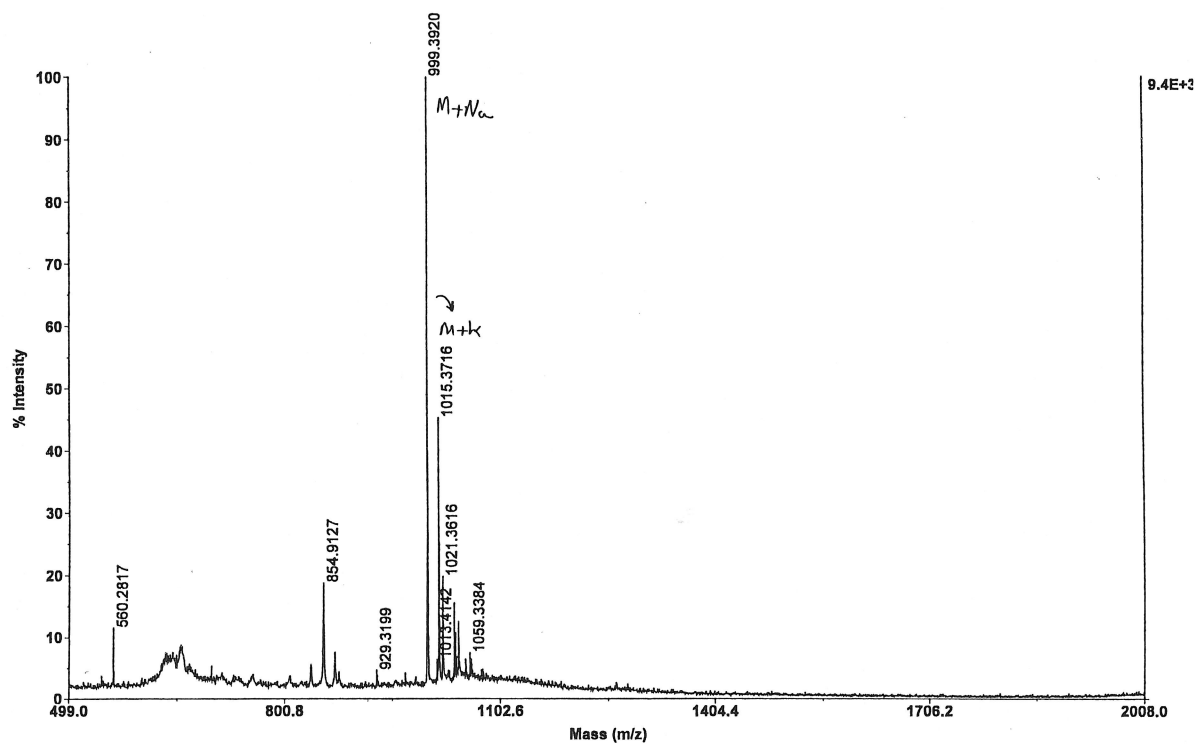



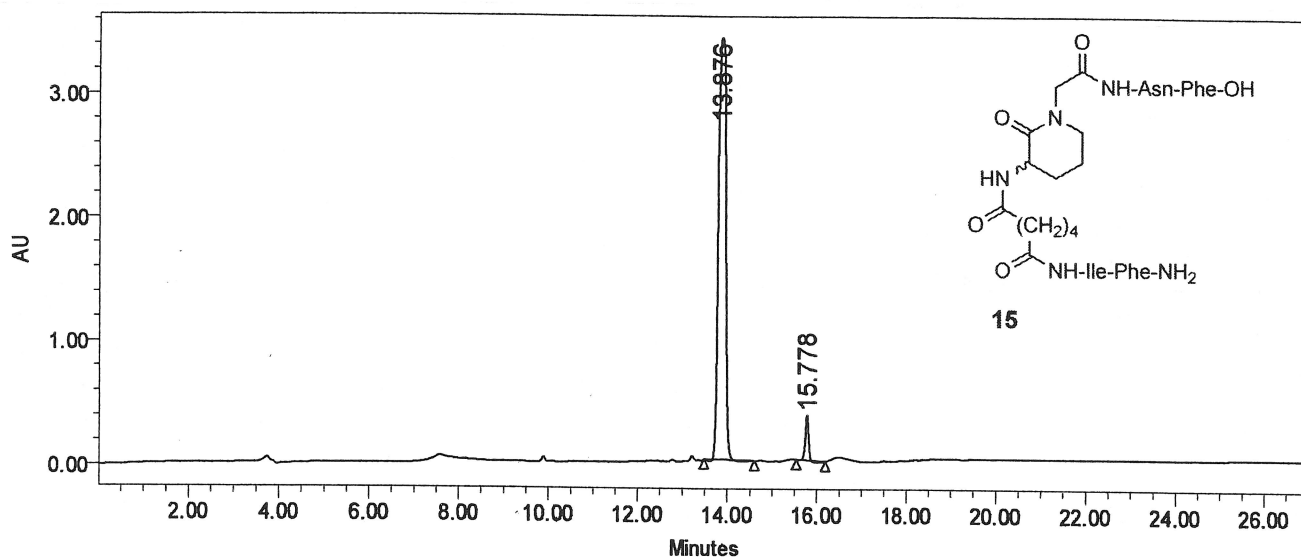

|   | RT<br>(min) | Area<br>( $\mu\text{V}\cdot\text{sec}$ ) | % Area | Height<br>( $\mu\text{V}$ ) |
|---|-------------|------------------------------------------|--------|-----------------------------|
| 1 | 13.876      | 39063716                                 | 95.09  | 3410341                     |
| 2 | 15.778      | 2015687                                  | 4.91   | 361998                      |

C:\Xcalibur\...100526\_EP-262  
100526\_EP-262

5/26/2010 5:22:26 PM

100526\_EP-262

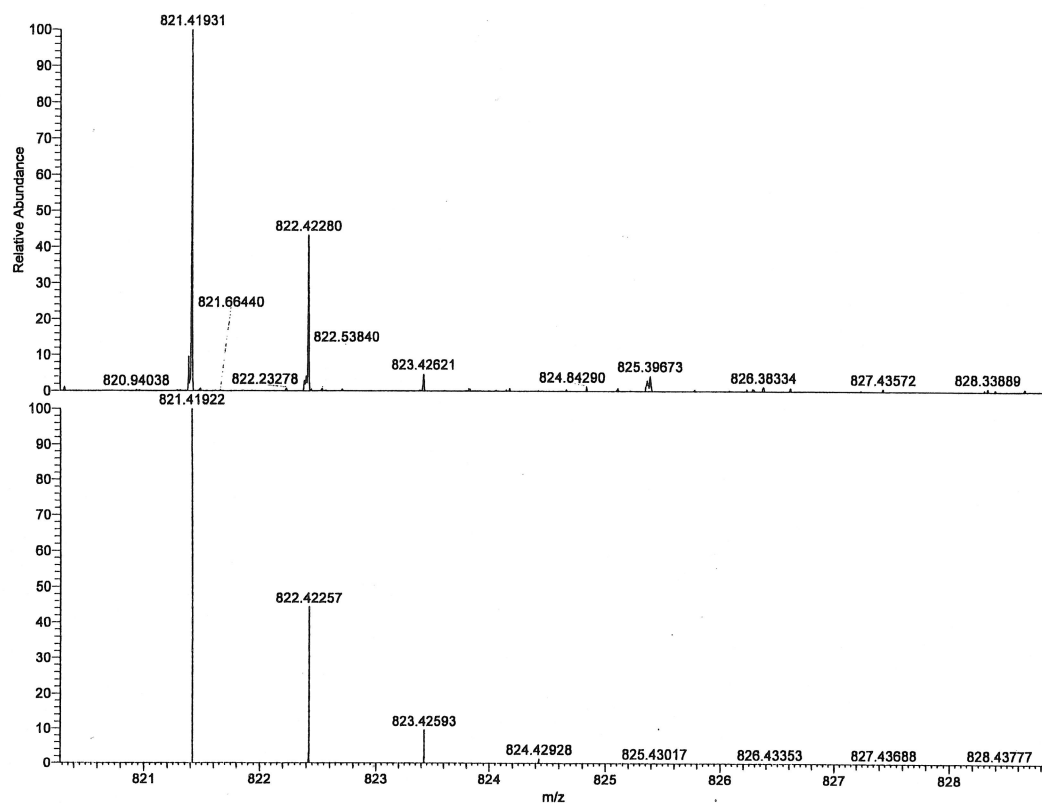

NL:  
4.84E5  
100526\_EP-262#12-  
36 RT: 0.31-0.98  
AV: 25 T: FTMS + p  
NSI Full ms  
[200.00-2000.00]

NL:  
6.06E5  
C<sub>41</sub>H<sub>58</sub>N<sub>8</sub>O<sub>10</sub> +H:  
C<sub>41</sub>H<sub>57</sub>N<sub>8</sub>O<sub>10</sub>  
pa Chrg 1

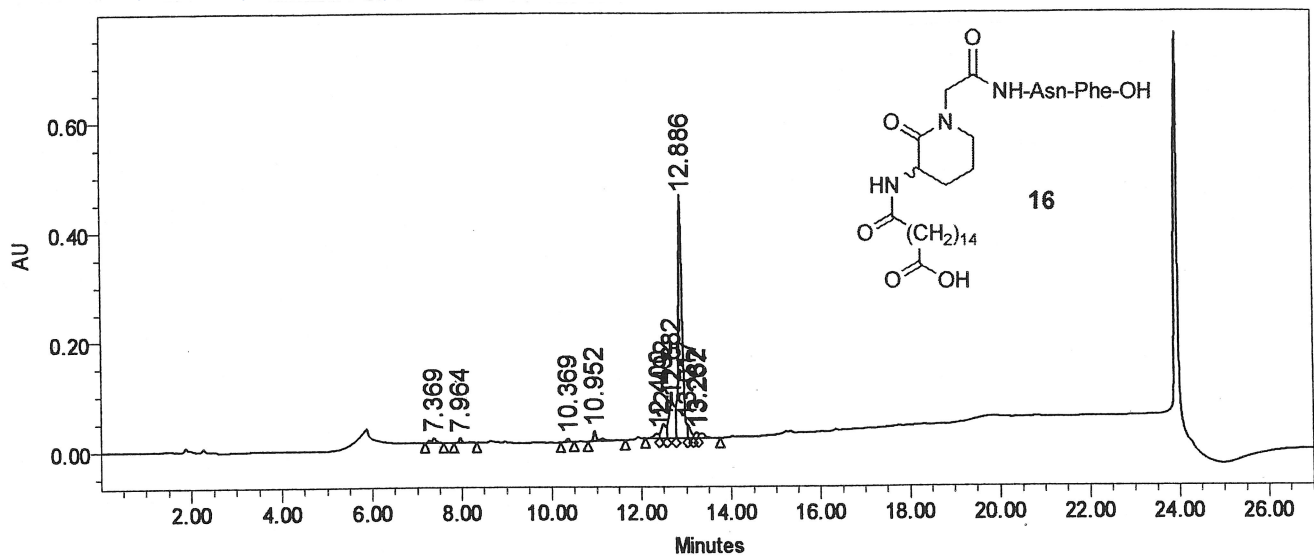

|    | RT<br>(min) | Area<br>( $\mu\text{V}\cdot\text{sec}$ ) | % Area | Height<br>( $\mu\text{V}$ ) |
|----|-------------|------------------------------------------|--------|-----------------------------|
| 1  | 7.369       | 68498                                    | 1.71   | 9446                        |
| 2  | 7.964       | 46975                                    | 1.17   | 9402                        |
| 3  | 10.369      | 31016                                    | 0.77   | 6386                        |
| 4  | 10.952      | 117645                                   | 2.93   | 18285                       |
| 5  | 12.400      | 60922                                    | 1.52   | 7479                        |
| 6  | 12.492      | 186115                                   | 4.64   | 25165                       |
| 7  | 12.682      | 612315                                   | 15.26  | 66415                       |
| 8  | 12.886      | 2645553                                  | 65.94  | 440895                      |
| 9  | 13.017      | 116966                                   | 2.92   | 24354                       |
| 10 | 13.232      | 55672                                    | 1.39   | 10255                       |
| 11 | 13.267      | 70288                                    | 1.75   | 7911                        |

C:\Xcalibur\...100526\_EP-260\_p  
100526\_EP-260\_p

5/26/2010 3:13:13 PM

100526\_EP-260\_p

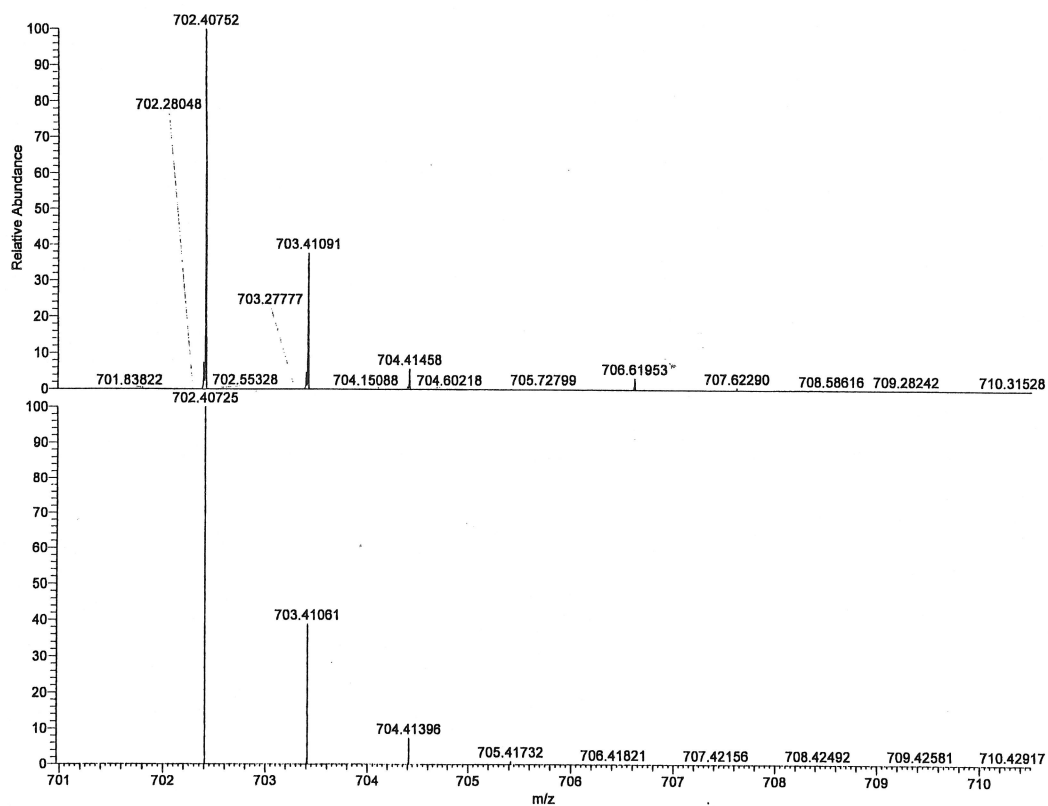

NL:  
3.47E5  
100526\_EP-260\_p#73-  
277 RT: 2.03-7.77  
AV: 205 T: FTMS + p  
NSI Full ms  
[200.00-2000.00]

NL:  
6.48E5  
C<sub>38</sub>H<sub>55</sub>N<sub>5</sub>O<sub>9</sub> + H:  
C<sub>38</sub>H<sub>55</sub>N<sub>5</sub>O<sub>9</sub>  
pa Chrg 1

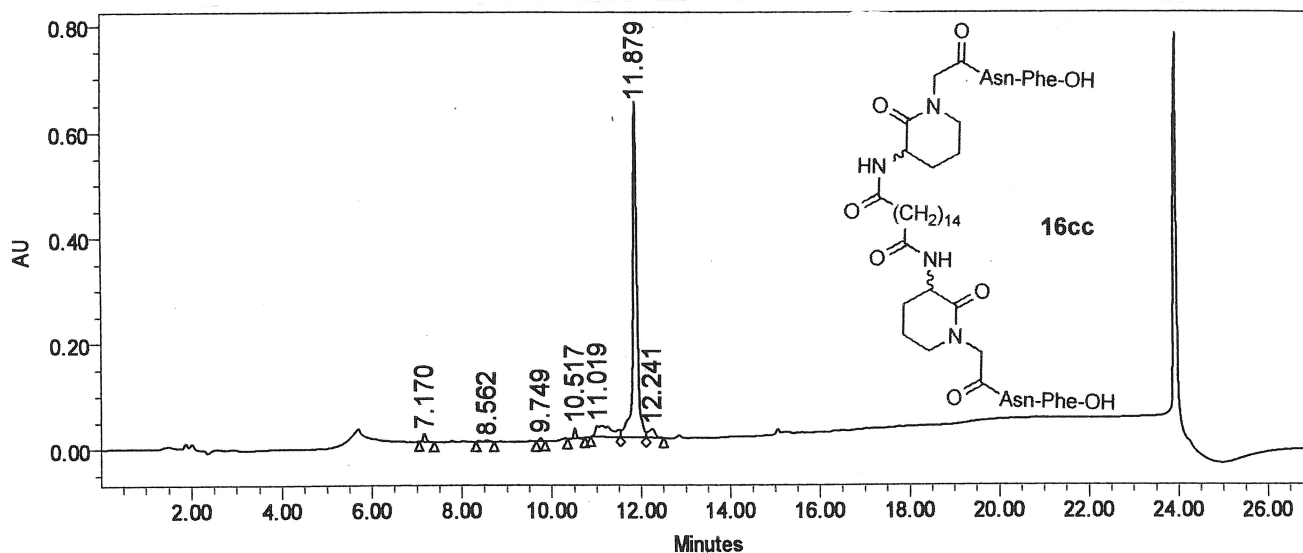

|   | RT<br>(min) | Area<br>( $\mu\text{V}\cdot\text{sec}$ ) | % Area | Height<br>( $\mu\text{V}$ ) |
|---|-------------|------------------------------------------|--------|-----------------------------|
| 1 | 7.170       | 73452                                    | 1.44   | 15522                       |
| 2 | 8.562       | 34060                                    | 0.67   | 3191                        |
| 3 | 9.749       | 24905                                    | 0.49   | 6372                        |
| 4 | 10.517      | 86506                                    | 1.70   | 19420                       |
| 5 | 11.019      | 580013                                   | 11.37  | 21407                       |
| 6 | 11.879      | 4119101                                  | 80.73  | 632868                      |
| 7 | 12.241      | 184316                                   | 3.61   | 16971                       |

C:\Xcalibur\...100526\_EP-260\_cc  
100526\_EP-260\_cc

5/26/2010 3:32:50 PM

100526\_EP-260\_cc

100526\_EP-260\_cc #15-93 RT: 0.39-2.60 AV: 79 NL: 1.04E5  
T: FTMS + p NSI Full ms [200.00-2000.00]

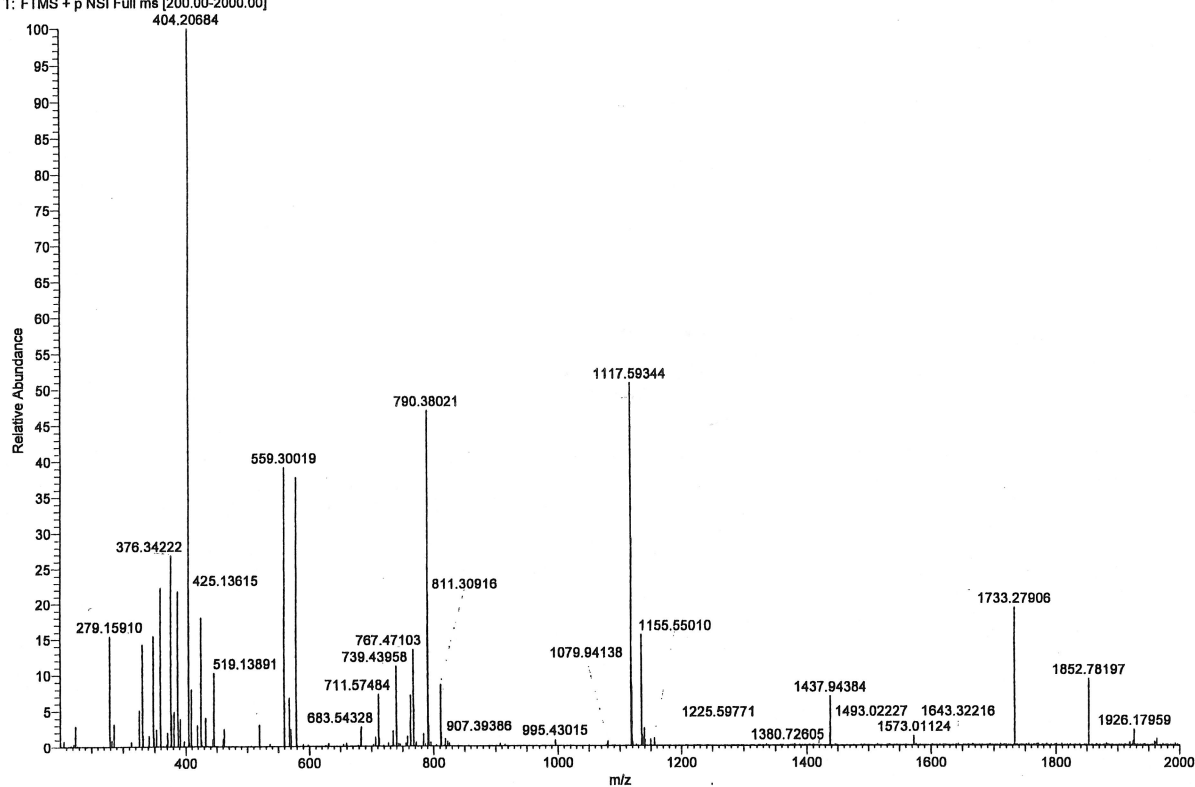

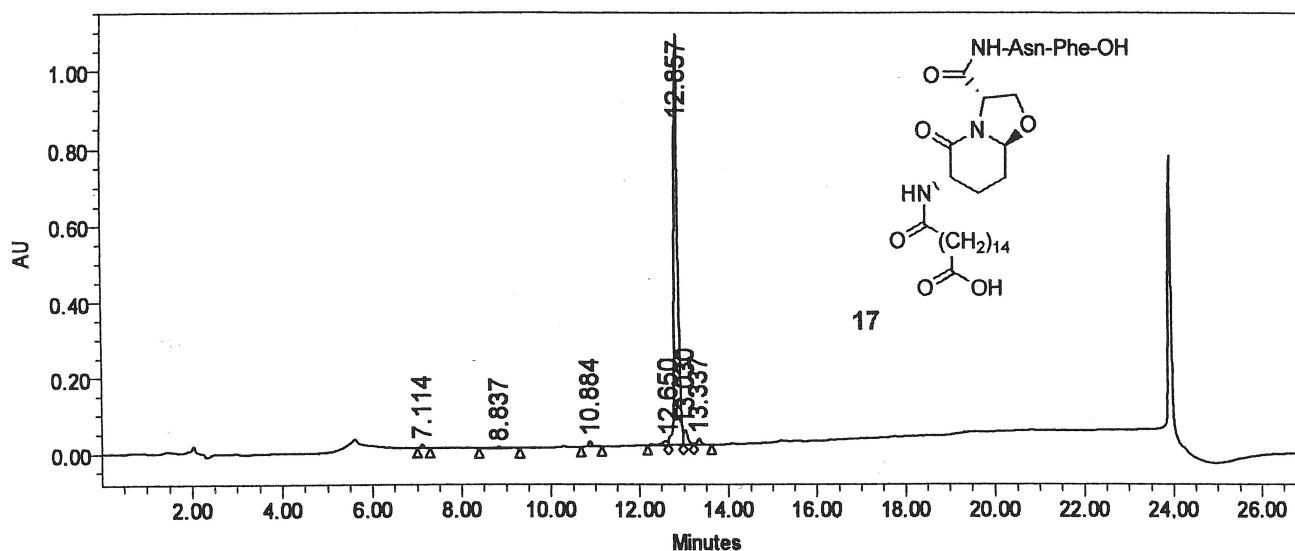

|   | RT<br>(min) | Area<br>( $\mu\text{V}\cdot\text{sec}$ ) | % Area | Height<br>( $\mu\text{V}$ ) |
|---|-------------|------------------------------------------|--------|-----------------------------|
| 1 | 7.114       | 49238                                    | 0.72   | 10024                       |
| 2 | 8.837       | 35795                                    | 0.52   | 4135                        |
| 3 | 10.884      | 81793                                    | 1.19   | 14433                       |
| 4 | 12.650      | 111827                                   | 1.63   | 12277                       |
| 5 | 12.857      | 6217855                                  | 90.54  | 1081714                     |
| 6 | 13.030      | 263182                                   | 3.83   | 39124                       |
| 7 | 13.337      | 107980                                   | 1.57   | 16410                       |

C:\Xcalibur\100526\_EP-253\_cc  
100526\_EP-253\_cc

5/28/2010 4:09:40 PM

100526\_EP-253\_cc

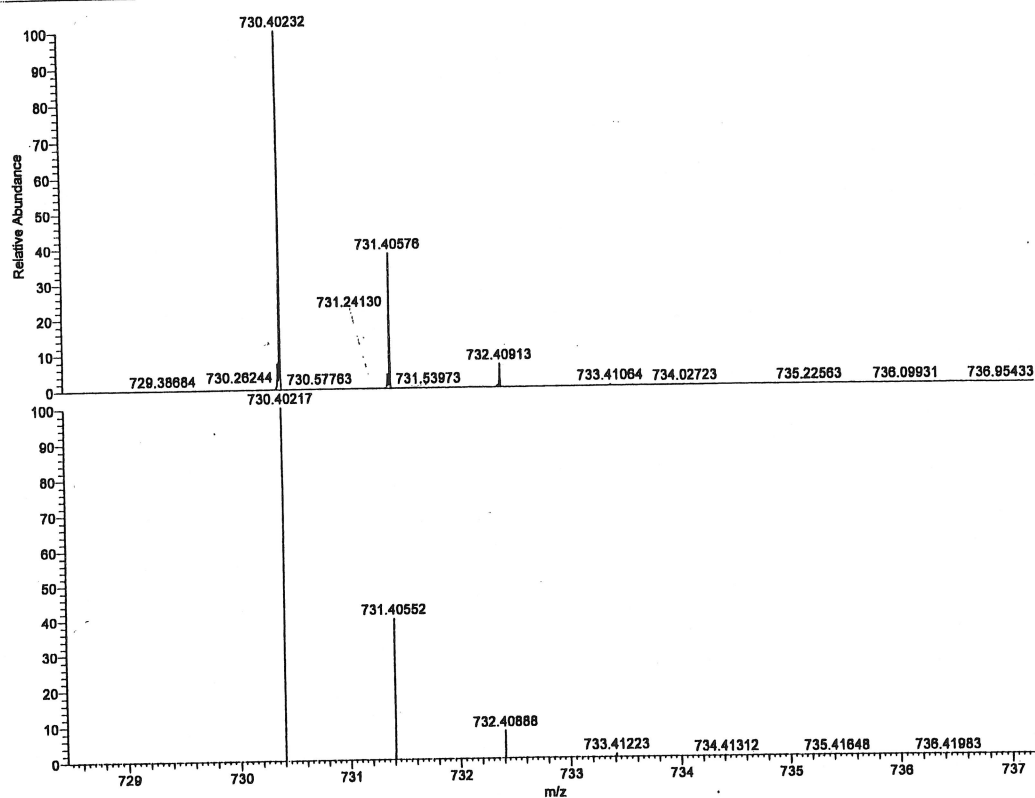

NL:  
6.69E5  
100526\_EP-  
253\_cc#15-47 RT:  
0.39-1.29 AV: 33 T:  
FTMS + p NSI Full ms  
[200.00-2000.00]

NL:  
6.39E5  
C<sub>37</sub>H<sub>58</sub>N<sub>5</sub>O<sub>10</sub><sup>+</sup>  
C<sub>37</sub>H<sub>58</sub>N<sub>5</sub>O<sub>10</sub>  
pa Chrg 1

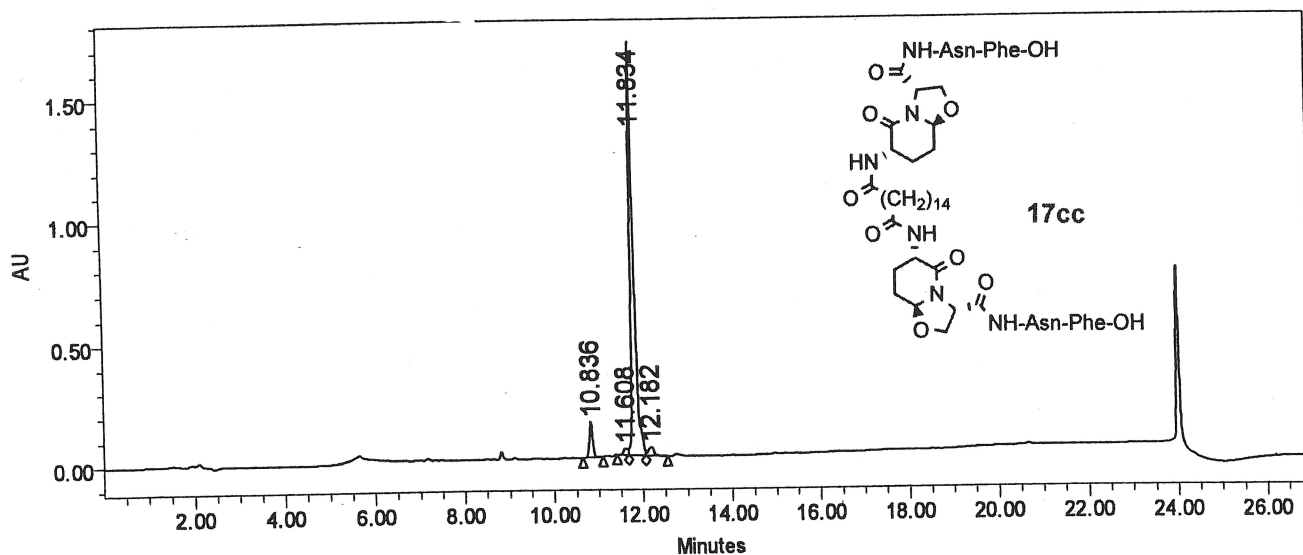

|   | RT<br>(min) | Area<br>( $\mu\text{V}\cdot\text{sec}$ ) | % Area | Height<br>( $\mu\text{V}$ ) |
|---|-------------|------------------------------------------|--------|-----------------------------|
| 1 | 10.836      | 746301                                   | 6.73   | 145566                      |
| 2 | 11.608      | 204316                                   | 1.84   | 27445                       |
| 3 | 11.834      | 9830308                                  | 88.63  | 1679777                     |
| 4 | 12.182      | 309911                                   | 2.79   | 35082                       |

C:\Xcalibur\100526\_EP-253\_p  
100526\_EP-253\_p

5/28/2010 4:15:24 PM

100526\_EP-253\_p

100526\_EP-253\_p #4-31 RT: 0.08-0.84 AV: 28 NL: 2.01E6  
T: FTMS + p NSI Full ms [200.00-2000.00]

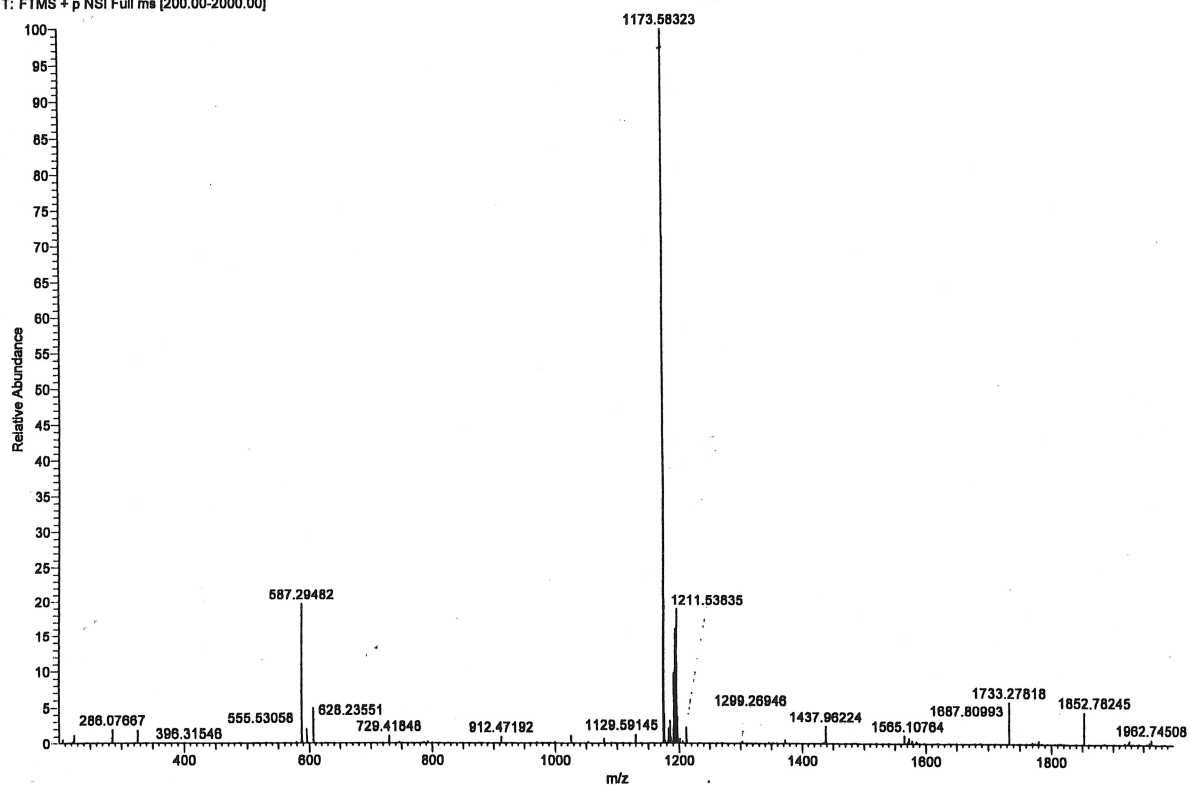

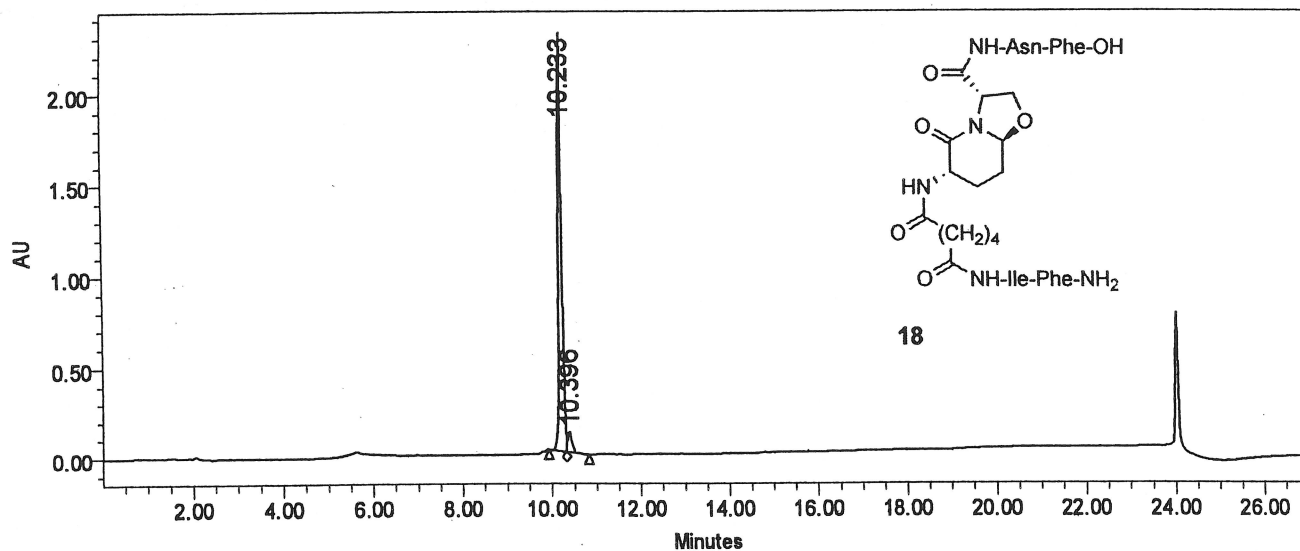

|   | RT<br>(min) | Area<br>( $\mu\text{V}\cdot\text{sec}$ ) | % Area | Height<br>( $\mu\text{V}$ ) |
|---|-------------|------------------------------------------|--------|-----------------------------|
| 1 | 10.233      | 12315684                                 | 94.33  | 2281723                     |
| 2 | 10.396      | 740102                                   | 5.67   | 113089                      |

Applied Biosystems 4700 Proteomics Analyzer 347000059

4700 Reflector Spec #1[BP = 887.3, 18256]

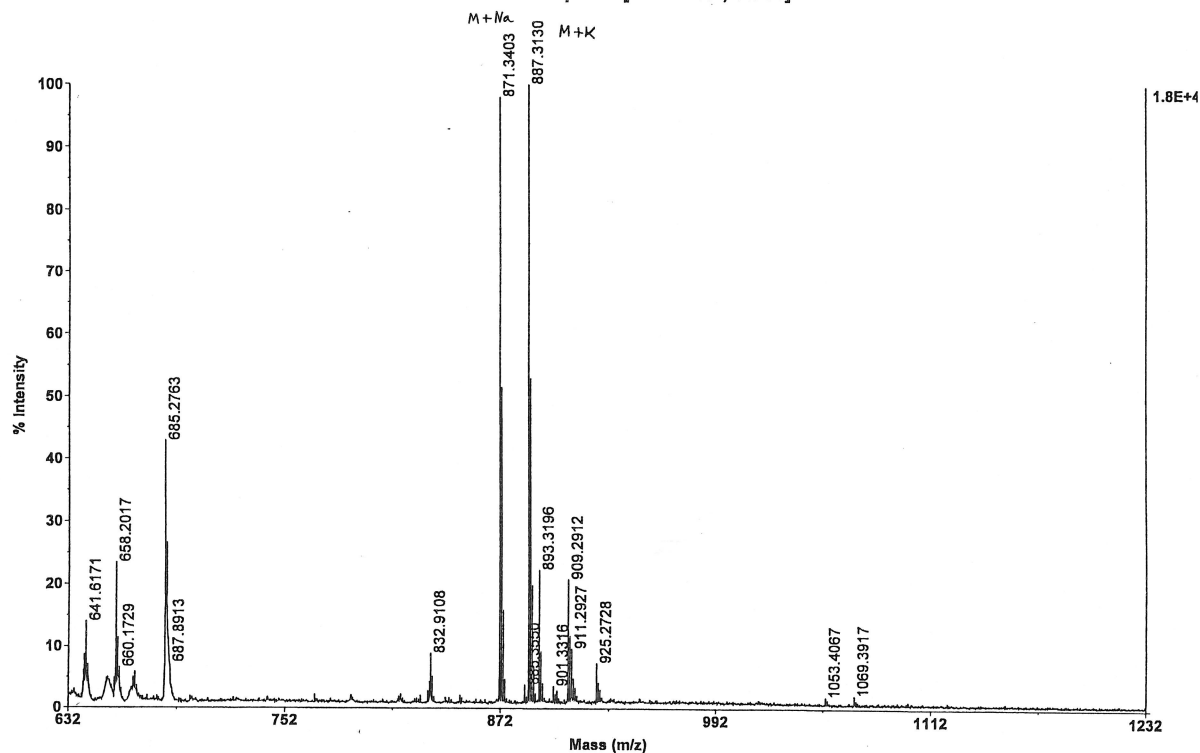

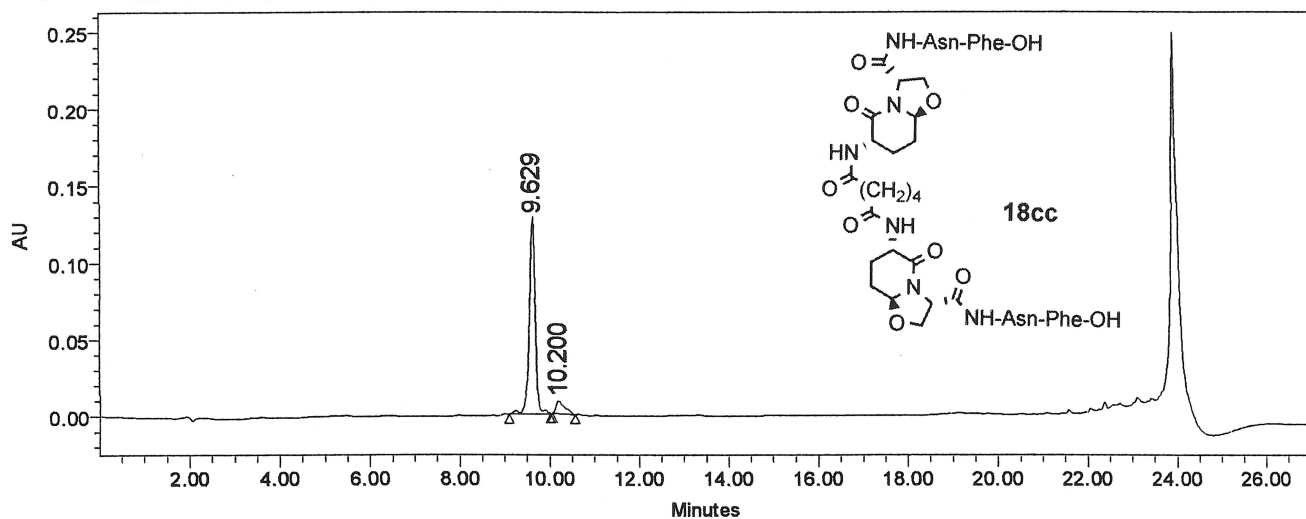

|   | RT<br>(min) | Area<br>( $\mu\text{V}\cdot\text{sec}$ ) | % Area | Height<br>( $\mu\text{V}$ ) |
|---|-------------|------------------------------------------|--------|-----------------------------|
| 1 | 9.629       | 1156513                                  | 91.41  | 128055                      |
| 2 | 10.200      | 108729                                   | 8.59   | 8175                        |

C:\Xcalibur\...100526\_EP-251\_cc  
100526\_EP-251\_cc

5/26/2010 5:10:24 PM

100526\_EP-251\_cc

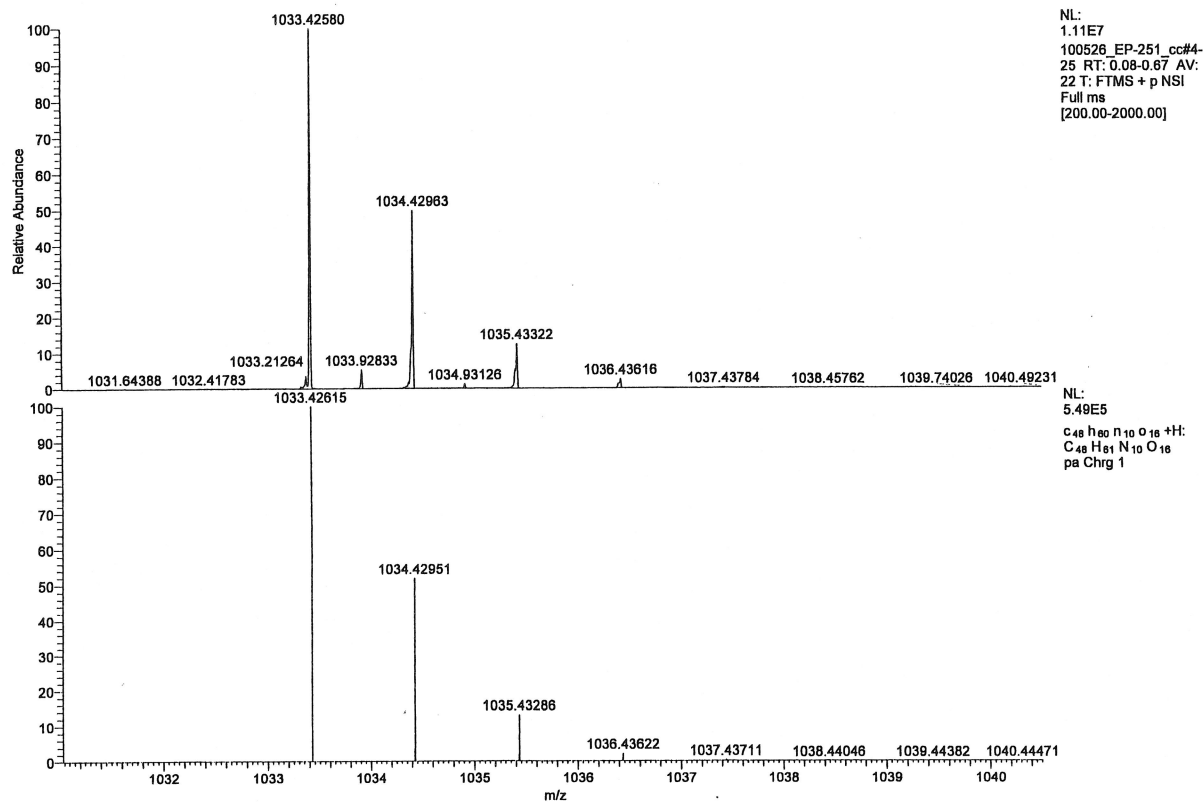



### Anti-HIV activity in cell culture<sup>1</sup> (EC<sub>50</sub>)

All compounds were tested in cultures cells infected with wild type HIV1 virus. The four most potent compounds were then tested on cells infected with the multidrug resistant HIV1 strain IRL98DPRO.<sup>2</sup> The test was based on the MTT colorimetric method that measures cellular proliferation,<sup>3</sup> specifically applied to HIV1-PR inhibitors.<sup>4</sup> The screening allowed determination of the 50% effective concentration (EC<sub>50</sub>) of the compounds as well as their 50% cytotoxic concentration (CC<sub>50</sub>). The results (Table 1) showed that four of our compounds (**6**, **14**, **15** and **16cc**) had antiviral activity on the wild type virus at the micromolar scale.

-----

(1) These tests were carried out at the IrsiCaixa AIDS Research Institute, Hospital Universitari Germans Trias i Pujol, Badalona (Spain).

(2) Moncunill, G.; Armand-Ugon, M.; Clotet-Codina, I.; Pauls, E.; Ballana, E.; Llano, A.; Romagnoli, B.; Vrijbloed, J. W.; Gombert, F. O.; Clotet, B.; De Marco, S.; Esté, J. A.. Anti-HIV activity and resistance profile of the CXCR4 chemokine receptor 4 antagonist POL3026. *Mol. Pharmacol.* **2008**, 73, 1264-73.

(3) a. Gonzalez-Ortega, E., Ballana, E., Badia, R., Clotet, B., and Este, J. A. (2011) *Antiviral Res* **92**, 479-483. b. Mosmann, T.; Rapid colorimetric assay for cellular growth and survival: application to proliferation and cytotoxicity assays. *J. Immunol. Methods* **1983**, 65, 55-63. c. Pauwels, R.; Balzarini, J.; Baba, M.; Snoeck, R.; Schols, D.; Herdewijn, P.; Desmyter, J.; DeClerq, E. Rapid and automated tetrazolium-based colorimetric assay for the detection of anti-HIV compounds. *J. Virol. Methods* **1988**, 20, 309-321.



(4) Davis, D.A.; Brown, C.A.; Singer, K.E.; Wang, V.; Kaufman, J.; Stahl, S.J.; Wingfield, P. Maeda, K. Harada, S.; Yoshimura, K.; Kosalaraksa, P.; Mitsuya, H.; Yarchoan, R. Inhibition of HIV-1 replication by a peptide dimerization inhibitor of HIV-1 protease. *Antiviral Res.* **2006**, 72, 89-99.

| Name        | Activity                        | MW (g/mol) | CC50 (µg/mL) | EC50 (wild type) | EC50 (mutant22) | Fold Resistance "R" |
|-------------|---------------------------------|------------|--------------|------------------|-----------------|---------------------|
| AZT         | Reverse transcriptase inhibitor | 276.24     | >1           | 1.09 nM          | 2.90 nM         | 2.6 <sup>a</sup>    |
| AMD 3100    | Fusion inhibitor                | 502.78     | >5           | 2.00 nM          | 8.00 nM         | 4 <sup>a</sup>      |
| Ritonavir   | Protease inhibitor              | 720.94     | >1           | 47.16 nM         | >1 µg/ml        | 19                  |
| Indinavir   | Protease inhibitor              | 613.79     | >1.2         | 8.15 nM          | 0.85 µM         | 104                 |
| <b>6</b>    | Protease inhibitor              | 573.76     | >125         | 97.17 µM         | 132 µM          | 1,36                |
| <b>14</b>   | Protease inhibitor              | 561.58     | >125         | 2.96 µM          | >125 µg/ml      | -                   |
| <b>15</b>   | Protease inhibitor              | 820.93     | >125         | 2.23 µM          | >125 µg/ml      | -                   |
| <b>16cc</b> | Protease inhibitor              | 1117.29    | >125         | 87.04 µM         | >125 µg/ml      | -                   |

a. AZT and AMD3100 are scarcely affected by the mutation of the protease, since they have different targets.

**Table 1.** Cell culture activity against native HIV1 and resistant mutant IRL98DPRO.
